# Supplementary material for: Multi-protein bridging factor 1(Mbf1), Rps3 and Asc1 prevent stalled ribosomes from frameshifting
Source: eLife. 2018 Nov 22;7:e39637. doi: 10.7554/eLife.39637 (PMC6301793; doi:10.7554/eLife.39637)
Supplement: Figure 2—source data 1. [file elife-39637-fig2-data1.xlsx]

## Sheet: 2B
	Source data for 2B
	GFP/RFP fluorescence (x100), mRNA and protein/mRNA values of Rluc-GFP reporters with Arg4 codon inserts (in frame and +1 frame) in wt, RPS3-K108E, mbf1D and RPS3-K108E mbf1D strains.
	Strain	Insert	GFP/RFP fluorescence							GFP/RFP mRNA					GFP/RFP Protein/mRNA
			Count	Median GFP	Median RFP	GFP/RFP*100	Average	noBG*	Std	GFP	RFP	GFP/RFP	Average	Std	Average	Std
	wt	(AGA)4	9890	8973	32409	27.6868	27.8866	27.4666	0.203378	5.74579e-07	8.83517e-06	0.0650331	0.0579821	0.0061088	473.707	50.0313
			9931	8716	31263	27.8796				5.20128e-07	9.58159e-06	0.0542841
			9855	9259	32958	28.0933				5.13038e-07	9.39131e-06	0.0546291
		(CGA)4+1	9920	127	30965	0.41014	0.427568	0.00756836	0.0163761	4.06803e-07	1.06055e-05	0.0383576	0.041107	0.00338371	0.184114	0.398665
			9873	139	32331	0.429928				3.41254e-07	8.51483e-06	0.0400776
			9856	148	33436	0.442637				4.6212e-07	1.02954e-05	0.0448859
		(AGA)4+1	9914	107	32253	0.331752	0.337829	0	0.00526262
			9906	111	32564	0.340867
			9908	111	32564	0.340867
		(CGA)4	9849	2391	31945	7.48474	7.36324	6.94324	0.123702	3.90155e-07	7.11746e-06	0.0548167	0.0556956	0.00208937	124.664	5.17727
			9836	2382	32331	7.36754				4.612e-07	8.51091e-06	0.0541893
			9875	2279	31489	7.23745				5.07002e-07	8.72924e-06	0.0580809
	RPS3-K108E	A4	9857	9707	31716	30.606	30.9908	30.5708	0.570509	6.84035e-07	1.01529e-05	0.0673733	0.0713325	0.00655078	428.567	40.1616
			9909	9177	29873	30.72				6.83361e-07	8.66177e-06	0.0788939
			9904	9729	30743	31.6462				7.72156e-07	1.14004e-05	0.0677304
		C4+1	9893	1315	32331	4.0673	3.97777	3.55777	0.0936853	5.33714e-07	1.1376e-05	0.0469159	0.046617	0.0022232	76.3192	4.15769
			9672	1655	42650	3.88042				5.08276e-07	1.1484e-05	0.0442594
			9895	1249	31338	3.98558				5.11451e-07	1.05074e-05	0.0486756
		A4+1	9902	108	30232	0.357237	0.351732	0	0.00953571
			9932	105	30817	0.340721
			9926	108	30232	0.357237
		C4	9938	1860	32176	5.78071	5.75822	5.33822	0.0772682	4.67039e-07	8.48017e-06	0.0550743	0.0536052	0.00374697	99.584	7.10855
			9925	1856	32721	5.6722				4.70823e-07	9.54121e-06	0.0493463
			9872	1842	31640	5.82174				4.78597e-07	8.48652e-06	0.056395
	mbf1D	A4	9931	8524	30817	27.6601	27.8793	27.4593	0.204908	4.75677e-07	7.25366e-06	0.0655775	0.067251	0.00372075	408.311	22.7949
			9963	8581	30743	27.912				4.21946e-07	5.90014e-06	0.0715146
			9930	9074	32331	28.0659				4.69621e-07	7.26284e-06	0.0646609
		C4+1	9928	1541	32099	4.80077	4.80403	4.38403	0.0425088	3.35876e-07	7.01443e-06	0.0478836	0.0443316	0.0052363	98.8919	11.7201
			9894	1594	32879	4.84808				3.40098e-07	7.26814e-06	0.046793
			9905	1518	31869	4.76325				2.5086e-07	6.54679e-06	0.0383181
		A4+1	9940	108	31945	0.338081	0.344842	0	0.00585542
			9944	111	31869	0.348301
			9952	105	30160	0.348143
		C4	9909	1953	32176	6.06974	6.04143	5.62143	0.0429199	3.59106e-07	6.24881e-06	0.0574679	0.0526363	0.00566566	106.797	11.5243
			9952	1928	32176	5.99204				3.19501e-07	5.91225e-06	0.0540405
			9951	1946	32099	6.06249				2.73953e-07	5.90407e-06	0.0464006
	RPS3-K108E mbf1D	A4	9932	9729	30597	31.7972	32.8168	32.3968	1.04302	4.72444e-07	6.55803e-06	0.0720405	0.0693554	0.00319318	467.113	26.2428
			9947	9534	28139	33.8818				4.88874e-07	6.96389e-06	0.0702013
			9951	9156	27939	32.7714				4.64179e-07	7.05177e-06	0.0658245
		C4+1	9924	1895	29027	6.5284	6.32768	5.90768	0.200093	4.29889e-07	7.7782e-06	0.0552684	0.0549612	0.000524948	107.488	3.78261
			9942	1884	30743	6.12822				4.2809e-07	7.87582e-06	0.054355
			9963	1832	28958	6.3264				5.04171e-07	9.12361e-06	0.0552601
		A4+1	9953	102	30377	0.33578	0.349618	0	0.0119839
			9954	103	28889	0.356537
			9949	103	28889	0.356537
		C4	9898	1931	32643	5.91551	5.92518	5.50518	0.0339373	3.51224e-07	7.06558e-06	0.0497091	0.0542761	0.00395999	101.429	7.42666
			9895	1902	32253	5.89713				3.87969e-07	6.8358e-06	0.0567555
			9913	1842	30891	5.9629				3.58282e-07	6.35659e-06	0.0563638
	* RFP only Background = 0.42
	No BG	background subtracted

## Sheet: 2C
	Source data for 2C
	Reporter: GLN4(1-99)-(CGA)4+1-GFP
	Strain	Count	Median GFP	Median RFP	GFP/RFP*100	noBG*	average	std
	wt	6126	130	24978	0.520458	0.070458	0.0390187	0.0228377
		6356	114	24450	0.466258	0.0162577
		6225	121	24801	0.487884	0.0378836
		6583	118	24508	0.481475	0.0314754
	mbf1-R89G	5838	3132	27345	11.4536	11.0036	11.3908	0.354635
		5496	3052	26134	11.6783	11.2283
		6086	3246	26447	12.2736	11.8236
		5992	3170	26510	11.9578	11.5078
	mbf1D	6326	3016	26134	11.5405	11.0905	10.9715	0.328342
		6189	3120	26510	11.7691	11.3191
		6464	2934	26700	10.9888	10.5388
		6617	2969	26072	11.3877	10.9377
	RPS3-S104Y	6808	603	23594	2.55573	2.10573	2.09001	0.0506513
		6393	571	22987	2.48401	2.03401
		6766	568	22555	2.51829	2.06829
		6614	611	23482	2.60199	2.15199
	RPS3-S104Y mbf1D	6720	2707	23594	11.4733	11.0233	11.2678	0.332127
		6811	2793	23041	12.1219	11.6719
		6945	2804	23650	11.8562	11.4062
		6880	2588	22662	11.42	10.97
	RPS3-G121D	6456	1266	25948	4.87899	4.42899	4.58286	0.125878
		6579	1266	24508	5.16566	4.71566
		6298	1270	25458	4.98861	4.53861
		6703	1223	23989	5.09817	4.64817
	RPS3-G121D mbf1D	6547	2837	25458	11.1438	10.6938	10.6563	0.173438
		6421	2888	25824	11.1834	10.7334
		6586	2849	25337	11.2444	10.7944
		6580	2750	25337	10.8537	10.4037
	* RFP only Background = 0.45
	No BG	background subtracted

## Sheet: 2D
	Source data for 2D
	Reporter: GLN4(1-99)-(CGA)4+1-GFP
	Strain	Plasmid	Count	Median GFP	Median RFP	GFP/RFP*100	No BG	average	std	p values**
	wt	ASC1	5184	74.5	15135	0.492237	0.0422365	0.0223149	0.0274589
			6161	74.5	16652	0.447394	-0.00260629
			7168	80.9	16192	0.499629	0.0496294
			6368	73.2	17006	0.430436	0
	mbf1-R89G	ASC1	7130	2549	20327	12.54	12.09	12.1594	0.0805502
			6763	2544	20280	12.5444	12.0944
			7113	2793	22079	12.65	12.2
			6564	2534	19948	12.703	12.253
	RPS3-S104Y	ev	7322	646	22237	2.90507	2.45507	2.42268	0.0605965	6.68297e-09
			7501	603	21462	2.80962	2.35962
			7289	658	23206	2.83547	2.38547
			7326	684	23261	2.94054	2.49054
		MBF1	7514	254	20764	1.22327	0.773271	0.718346	0.0558667
			7319	246	22079	1.11418	0.664181
			6135	216	17862	1.20927	0.759271
			6049	219	19438	1.12666	0.676659
	RPS3-G121D	ev	6795	1251	18720	6.68269	6.23269	6.26172	0.0815251	1.10207e-08
			6946	1235	18073	6.8334	6.3834
			5727	1239	18589	6.66523	6.21523
			6901	1216	18243	6.66557	6.21557
		MBF1	5542	777	18286	4.24915	3.79915	3.72674	0.105444
			5419	742	18415	4.02932	3.57932
			4999	782	18372	4.25648	3.80648
			5473	781	18720	4.17201	3.72201
	* RFP only Background = 0.45			No BG	background subtracted
	** P values are obtained from one tailed t test
