# Supplementary material for: Multi-protein bridging factor 1(Mbf1), Rps3 and Asc1 prevent stalled ribosomes from frameshifting
Source: eLife. 2018 Nov 22;7:e39637. doi: 10.7554/eLife.39637 (PMC6301793; doi:10.7554/eLife.39637)
Supplement: Figure 3—figure supplement 1—source data 1. [file elife-39637-fig3-figsupp1-data1.xlsx]

## Sheet: Fig3S1
	Source data for Figure3-figure supplement 1A --- see Figure3-Source data 1
	Source data for Figure3-figure supplement 1B
	GFP/RFP x 100 values of Rluc-GFP reporters with codon inserts (in frame, +1 and -1 frame) in wt, asc1D, mbf1D and asc1D mbf1D strains.
	Strain	Insert	Count	GFP Median	RFP Median	GFP/RFP*100	Average	noBG*	std
	wt	(AGA)4	9815	6616	26447	25.0161	24.6104	24.1504	0.957859
			9867	6545	26196	24.9847
			9971	4976	21462	23.1852
			9605	6616	26196	25.2558
		(CGA)4	9865	2691	27021	9.95892	8.34224	7.88224	1.12254
			9777	2396	29236	8.19538
			9864	2080	28005	7.42725
			9815	2223	28546	7.78743
		(AGA)4+1	9868	151	27345	0.552203	0.562906	0.102906	0.0543602
			9703	136	25824	0.526642
			9614	164	25519	0.642658
			9859	146	27541	0.530119
		(CGA)4+1	9845	157	26700	0.588015	0.637077	0.177077	0.0562891
			9350	182	25948	0.701403
			9668	182	27280	0.667155
			9876	173	29236	0.591736
		(AGA)4-1	9908	148	29730	0.497814	0.543055	0.0830552	0.037969
			9821	156	28546	0.546486
			9776	147	27345	0.537575
			9816	158	26764	0.590345
		(CGA)4-1	9757	161	27150	0.593002	0.556793	0.096793	0.031862
			9888	143	27673	0.516749
			9824	152	26828	0.566572
			9884	158	28683	0.550849
	asc1D	(AGA)4	9969	12018	29377	40.9096	41.9993	41.5393	0.888572
			9940	12669	30377	41.7059
			9926	13296	31338	42.4277
			9858	13174	30670	42.954
		(CGA)4	9909	9555	33759	28.3036	28.3313	27.8713	0.218684
			9915	9218	32176	28.6487
			9887	9449	33516	28.1925
			9886	8581	30450	28.1806
		(AGA)4+1	9946	209	32409	0.644883	0.717292	0.257292	0.0550201
			9652	257	33356	0.770476
			9918	241	32253	0.747217
			9927	229	32409	0.706594
		(CGA)4+1	9933	1523	30670	4.96576	4.99637	4.53637	0.108957
			9876	1624	32800	4.95122
			9934	1573	32022	4.91225
			9897	1612	31263	5.15625
		(AGA)4-1	9919	252	35336	0.713154	0.710971	0.250971	0.0603281
			9882	279	36901	0.756077
			9846	282	37619	0.749621
			9849	234	37438	0.625033
		(CGA)4-1	9876	362	37529	0.964587	0.912807	0.452807	0.0374447
			9939	326	36635	0.889859
			9951	326	36990	0.881319
			9955	337	36812	0.915462
	mbf1D	(AGA)4	9896	7080	27085	26.1399	25.859	25.399	0.383782
			9927	6942	27280	25.4472
			9895	7003	26700	26.2285
			9910	6792	26510	25.6205
		(CGA)4	9877	1906	28207	6.75719	6.59494	6.13494	0.222002
			9860	1804	27541	6.55023
			9726	1839	27150	6.77348
			9897	1764	28005	6.29888
		(AGA)4+1	9859	161	25097	0.641511	0.596563	0.136563	0.0898158
			9873	190	27541	0.689881
			9890	153	26764	0.571663
			9939	135	27939	0.483196
		(CGA)4+1	9931	1016	28005	3.62792	3.67468	3.21468	0.0593373
			9755	1036	27541	3.76166
			9893	1014	27739	3.6555
			9880	1038	28410	3.65364
		(AGA)4-1	9932	149	27739	0.53715	0.542567	0.0825674	0.0340687
			9933	143	28614	0.499755
			9877	153	27739	0.55157
			9885	161	27673	0.581795
		(CGA)4-1	9852	238	27541	0.864166	0.829497	0.369497	0.0329022
			9918	226	27607	0.818633
			9926	229	29027	0.788921
			9909	241	28478	0.846267
	asc1D mbf1D	(AGA)4	9931	10248	25824	39.684	39.8294	39.3694	0.208236
			9891	10110	25277	39.9968
			9915	10110	25519	39.6175
			9914	9996	24978	40.0192
		(CGA)4	9854	2843	26828	10.5971	10.5525	10.0925	0.0540721
			9941	2777	26447	10.5002
			9921	2686	25337	10.6011
			9945	2676	25458	10.5114
		(AGA)4+1	9912	226	26447	0.854539	0.862111	0.402111	0.0584984
			9923	199	25277	0.787277
			9855	234	25217	0.927945
			9938	228	25948	0.87868
		(CGA)4+1	9914	2843	26637	10.6731	10.701	10.241	0.0586234
			9949	2826	26196	10.7879
			9947	2681	25097	10.6826
			9951	2860	26828	10.6605
		(AGA)4-1	9924	252	28139	0.895554	0.868232	0.408232	0.0467234
			9934	237	27607	0.858478
			9965	237	29377	0.806754
			9898	261	28614	0.912141
		(CGA)4-1	9944	608	28207	2.15549	2.2092	1.7492	0.0786512
			9827	622	26764	2.32402
			9948	611	28274	2.161
			9923	602	27410	2.19628
	* RFP only Background = 0.46
	noBG*	background subtracted
