# Supplementary material for: Multi-protein bridging factor 1(Mbf1), Rps3 and Asc1 prevent stalled ribosomes from frameshifting
Source: eLife. 2018 Nov 22;7:e39637. doi: 10.7554/eLife.39637 (PMC6301793; doi:10.7554/eLife.39637)
Supplement: Figure 3—figure supplement 2—source data 2. [file elife-39637-fig3-figsupp2-data2.xlsx]

## Sheet: Fig3S2
	Source data for Figure3-figure supplement 2B
	Strain: mbf1D		Reporter: Rluc-insert-GFP
	Insert	Plasmid	Count	GFP Median	RFP Median	GFP/RFP*100	Average	noBG*	std	P values**
	(CGA)4	ev	9953	1315	20569	6.39312	6.4478	5.9478	0.361771	0.254034
			9606	1300	19256	6.75114
			9903	1297	21768	5.95829
			9902	1258	18808	6.68864
		ASC1	9313	1290	18073	7.13772	6.77958	6.27958	0.381981
			9857	1216	18200	6.68132
			9970	1305	20764	6.28492
			9273	1310	18676	7.01435
	(AGA)4	ev	9965	5347	20232	26.4284	26.5997	26.0997	0.564691	0.880968
			9530	4965	18115	27.4082
			9914	5060	19392	26.0932
			9893	5509	20813	26.469
		ASC1	8535	4862	16887	28.7914	26.7818	26.2818	2.26095
			7746	4556	15930	28.6001
			9927	4903	20184	24.2915
			9895	4741	18633	25.4441
	(CGA)4+1	ev	9478	2917	58892	4.95313	4.45487	3.95487	0.34831	0.908746
			9937	842	20089	4.19135
			9975	908	21411	4.24081
			9689	895	20184	4.43421
		ASC1	9822	880	20520	4.2885	4.43112	3.93112	0.191334
			8280	807	17490	4.61407
			8756	835	18243	4.5771
			9875	869	20472	4.24482
	(AGA)4+1	ev	9698	51.4	19392	0.265058	0.264421	0	0.00529723	0.0321607
			9630	50.1	18808	0.266376
			9959	52.6	20472	0.256936
			9972	57.8	21462	0.269313
		ASC1	9953	59.1	20569	0.287326	0.286826	0	0.0152474
			9939	59.1	19301	0.306202
			9910	55.2	20520	0.269006
			9961	60.4	21210	0.284771
	* RFP only Background = 0.5
	noBG*	background subtracted
	** P values are obtained from two tailed t test
