# Supplementary material for: Multi-protein bridging factor 1(Mbf1), Rps3 and Asc1 prevent stalled ribosomes from frameshifting
Source: eLife. 2018 Nov 22;7:e39637. doi: 10.7554/eLife.39637 (PMC6301793; doi:10.7554/eLife.39637)
Supplement: Figure 3—source data 1. [file elife-39637-fig3-data1.xlsx]

## Sheet: 3A
	Source data for 3A and figure supplement 1A
	GFP/RFP fluorescence (x100), mRNA and protein/mRNA values of GLN4 (1-99)-GFP reporters with (Arg-Arg)3 codon inserts (0, +1, and -1 frame) in wt, asc1D, mbf1D and asc1D mbf1D strains.
	Strain	Insert	GFP/RFP fluorescence							GFP/RFP mRNA					GFP/RFP Protein/mRNA
			Count	Median GFP	Median RFP	GFP/RFP*100	average	noBG*	std	GFP	RFP	GFP/RFP	average	std	Average	Std
	wt	(AGA-AGA)3	9902	19714	27150	72.6114	72.7652	72.3352	1.14103
			9841	20520	27739	73.9753
			9883	20617	28751	71.7088
		(CGA-CGA)3	9793	5812	26956	21.5611	21.7815	21.3515	0.342182	6.13532e-07	6.64695e-06	0.0923027	0.100634	0.0125835	212.171	26.7475
			9823	5951	27541	21.6078				9.47518e-07	1.00278e-05	0.0944891
			9838	6093	27476	22.1757				1.31136e-06	1.13923e-05	0.115109
		(AGA-AGA)3+1	9873	146	28342	0.515137	0.50251	0.0725099	0.0159503
			9820	138	28478	0.484585
			9838	146	28751	0.507808
		(CGA-CGA)3+1	9914	114	22555	0.505431	0.537536	0.107536	0.0291926	4.55341e-07	7.98933e-06	0.0569936	0.0613194	0.00440824	1.75371	0.492485
			9900	147	26134	0.562486				4.54079e-07	7.42457e-06	0.0611589
			9871	139	25519	0.544692				4.22449e-07	6.41964e-06	0.0658057
		(AGA-AGA)3-1	9916	161	31114	0.517452	0.498451	0.0684507	0.0281824
			9850	143	27939	0.511829
			9816	134	28751	0.466071
		(CGA-CGA)3-1	9932	148	25641	0.577201	0.520947	0.0909475	0.0559992	2.7936e-07	8.56212e-06	0.0326274	0.0424552	0.00851731	2.1422	1.38727
			9925	116	22289	0.520436				2.84955e-07	5.97475e-06	0.0476933
			9947	121	26010	0.465206				3.48774e-07	7.41363e-06	0.0470449
	asc1D	(AGA-AGA)3	9910	21717	36990	58.7105	57.8008	57.3708	0.838797
			9913	23706	41132	57.634
			9936	21310	37348	57.0579
		(CGA-CGA)3	9873	18243	38444	47.4534	48.0229	47.5929	0.876867	1.74217e-06	8.81814e-06	0.197567	0.200179	0.0140198	237.752	17.2178
			9872	18030	37892	47.5826				1.66227e-06	8.85839e-06	0.187649
			9898	15967	32564	49.0327				1.64615e-06	7.6451e-06	0.215321
		(AGA-AGA)3+1	9883	244	34414	0.709014	0.664772	0.234772	0.04501
			9925	234	37801	0.619031
			9927	236	35421	0.666271
		(CGA-CGA)3+1	9906	2123	32800	6.47256	6.36987	5.93987	0.0949744	1.26607e-06	7.31668e-06	0.173039	0.163509	0.00838386	36.3275	1.95115
			9926	2132	33921	6.28519				8.80672e-07	5.59976e-06	0.15727
			9974	1902	29944	6.35186				8.91859e-07	5.56654e-06	0.160218
		(AGA-AGA)3-1	9853	277	37348	0.741673	0.701677	0.271677	0.0729776
			9901	250	33516	0.745912
			9936	213	34497	0.617445
		(CGA-CGA)3-1	9942	274	34167	0.801943	0.820971	0.390971	0.0256965	6.54148e-07	8.16221e-06	0.0801435	0.0698762	0.0153559	5.59521	1.28341
			9944	259	31945	0.810769				3.47333e-07	6.65098e-06	0.0522229
			9909	294	34580	0.850202				7.74631e-07	1.0026e-05	0.0772621
	mbf1D	(AGA-AGA)3	9595	20520	27673	74.1517	73.9637	73.5337	0.370142
			9895	22662	30817	73.5373
			9899	19392	26134	74.2022
		(CGA-CGA)3	9837	4425	25398	17.4226	17.0118	16.5818	0.364423	6.57918e-07	7.12633e-06	0.0923222	0.0836291	0.0082562	198.278	20.054
			9952	3693	21871	16.8854				6.70815e-07	8.1142e-06	0.0826718
			9838	4585	27410	16.7275				5.50615e-07	7.25512e-06	0.0758933
		(AGA-AGA)3+1	9958	118	31338	0.37654	0.394067	0	0.0413692
			9939	123	33759	0.364347
			9928	136	30817	0.441315
		(CGA-CGA)3+1	9915	2341	31114	7.52394	7.3996	6.9696	0.167705	4.12098e-07	5.3118e-06	0.0775815	0.084061	0.0234113	82.9113	23.1771
			9882	1680	22502	7.466				5.73535e-07	5.21255e-06	0.11003
			9861	2270	31489	7.20887				4.61804e-07	7.15176e-06	0.064572
		(AGA-AGA)3-1	9925	149	33921	0.439256	0.46917	0.0391698	0.0290852
			9923	140	29730	0.470905
			9842	136	27345	0.497349
		(CGA-CGA)3-1	9898	254	31640	0.802781	0.764338	0.334338	0.0419268	3.19289e-07	6.32929e-06	0.0504463	0.0480881	0.00362243	6.95262	1.01709
			9869	274	38075	0.719632				3.00155e-07	6.83457e-06	0.0439171
			9973	199	25824	0.770601				4.52096e-07	9.05989e-06	0.0499008
	asc1D mbf1D	(AGA-AGA)3	9929	19211	31793	60.4253	60.2772	59.8472	0.928734
			9942	19714	32253	61.123
			9953	19075	32176	59.2833
		(CGA-CGA)3	9950	8355	29377	28.4406	29.0815	28.6515	0.803145	1.70184e-06	1.03827e-05	0.163912	0.152801	0.0331053	187.509	40.9638
			9921	9054	31414	28.8215				1.11907e-06	6.25458e-06	0.178921
			9877	9929	33116	29.9825				9.91218e-07	8.57685e-06	0.115569
		(AGA-AGA)3+1	9982	191	29588	0.645532	0.657428	0.227428	0.0107821
			9955	202	30305	0.666557
			9957	202	30597	0.660195
		(CGA-CGA)3+1	9977	4604	29377	15.6721	15.8392	15.4092	0.18663	8.73259e-07	6.25402e-06	0.139632	0.151771	0.0129902	101.53	8.77658
			9946	4643	29377	15.8049				9.96505e-07	6.6341e-06	0.15021
			9936	5039	31414	16.0406				1.11711e-06	6.7511e-06	0.165471
		(AGA-AGA)3-1	9987	216	29167	0.740563	0.732789	0.302789	0.0128077
			9971	221	29873	0.739798
			9971	215	29944	0.718007
		(CGA-CGA)3-1	9967	613	27806	2.20456	2.18424	1.75424	0.0207881	5.08192e-07	5.16329e-06	0.0984241	0.0812702	0.0162324	21.5853	4.31889
			9946	673	31114	2.16301				4.53605e-07	6.8571e-06	0.0661512
			9931	715	32721	2.18514				5.68378e-07	7.1733e-06	0.0792352
	* RFP only Background = 0.43
	noBG*	background subtracted

## Sheet: 3C
	Source data for 3C
	Strain: asc1D		Reporter: GLN4(1-99)-insert-GFP
	Insert	Plasmid	Count	Median GFP	Median RFP	GFP/RFP*100	average	noBG*	std	P values**
	(AGA-AGA)3	ev	5276	6602	19668	33.5672	32.3713	31.8313	1.27944	0.0624751
			4829	6957	22395	31.065
			5175	6335	18986	33.3667
			4648	6631	21060	31.4862
		MBF1	5032	5874	18897	31.0843	29.2201	28.6801	2.44507
			4484	6645	21110	31.478
			4734	5497	19761	27.8174
			4909	5103	19256	26.5008
	(AGA-AGA)3+1	ev	4883	69.4	16535	0.419716	0.410174	0	0.0235796
			4572	82.2	18720	0.439103
			3085	99	25337	0.390733
			2892	97.7	24978	0.391144
		MBF1	4179	79.6	20089	0.396237	0.38285	0	0.0200494
			4614	74.5	18941	0.393327
			4193	80.9	20813	0.388699
			1853	103	29167	0.353139
	(CGA-CGA)3	ev	4995	4821	19576	24.6271	24.4881	23.9481	1.16537	0.47015
			5218	4547	19807	22.9565
			4955	4955	19211	25.7925
			5130	5103	20764	24.5762
		MBF1	5037	4462	20232	22.0542	23.7618	23.2218	1.48132
			4616	5224	20862	25.0407
			4875	4944	19807	24.9609
			4974	4490	19529	22.9914
	(CGA-CGA)3+1	ev	4333	976	19714	4.9508	4.75465	4.21465	0.138908	3.50559e-07
			4981	868	18633	4.6584
			4493	946	20327	4.65391
			4629	884	18589	4.7555
		MBF1	4445	396	19347	2.04683	1.96315	1.42315	0.187558
			4527	405	18676	2.16856
			4813	378	19854	1.9039
			4402	326	18808	1.7333
	* RFP only Background = 0.54
	noBG*	background subtracted
	** P values are obtained from two tailed t test
