# Supplementary material for: Multi-protein bridging factor 1(Mbf1), Rps3 and Asc1 prevent stalled ribosomes from frameshifting
Source: eLife. 2018 Nov 22;7:e39637. doi: 10.7554/eLife.39637 (PMC6301793; doi:10.7554/eLife.39637)
Supplement: Figure 4—figure supplement 1—source data 1. [file elife-39637-fig4-figsupp1-data1.xlsx]

## Sheet: F4S1A
	Source data for Figure 4-figure supplement 1A
	GFP/RFP fluorescence (x100) of GLN4 (1-99)-GFP reporters with (Arg-Pro)3 codon inserts (0, +1, and -1 frame) in wt, asc1D, mbf1D and asc1D mbf1D strains.
	Strain	Insert	Count	RFP Median	GFP Median	GFP/RFP	average	noBG*	std
	wt	(AGA-CCA)3	9637	36547	34746	95.0721	80.4587	79.9287	11.9226
			9989	49200	41032	83.3984
			9994	48725	32486	66.6721
			9996	44981	34497	76.6924
		(CGA-CCG)3	9991	53045	8244	15.5415	16.196	15.666	3.33769
			9996	51024	9773	19.1537
			9968	44333	5213	11.7587
			9996	51898	9513	18.3302
		(AGA-CCA)3+1	9990	50408	182	0.361054	0.341379	0	0.0398538
			9989	48607	175	0.36003
			9996	50777	143	0.281624
			9997	50164	182	0.36281
		(CGA-CCG)3+1	9982	51397	219	0.426095	0.421229	0	0.0476514
			9995	55148	195	0.353594
			9995	45972	203	0.441573
			9988	50900	236	0.463654
		(AGA-CCA)3-1	9945	42342	151	0.35662	0.343893	0	0.0247816
			9991	50531	155	0.306742
			9995	48725	174	0.357106
			9994	50408	179	0.355102
		(CGA-CCG)3-1	9991	52151	352	0.674963	0.61623	0.0862299	0.0740624
			9961	43800	289	0.659817
			9999	48607	301	0.619252
			9996	53045	271	0.510887
	asc1D	(AGA-CCA)3	9989	47905	30965	64.6383	65.3351	64.8051	1.27258
			9991	53303	34414	64.563
			239	14618	2755	18.8466	OUTLIER
			9993	50777	33921	66.8039
		(CGA-CCG)3	9992	47443	18808	39.6434	39.5095	38.9795	3.01621
			9986	64446	24566	38.1187
			9982	53174	23206	43.6416
			9998	49680	18200	36.6345
		(AGA-CCA)3+1	9987	54747	1239	2.26314	1.01596	0.485958	0.831851
			9988	52151	332	0.636613
			9993	49921	290	0.580918
			9989	46985	274	0.583165
		(CGA-CCG)3+1	9993	50900	1649	3.23969	2.33554	1.80554	0.603427
			9986	43906	901	2.05211
			9988	48843	974	1.99414
			9989	50286	1034	2.05624
		(AGA-CCA)3-1	9984	56505	286	0.50615	0.541795	0.0117954	0.07597
			9994	55282	305	0.551717
			9979	51898	242	0.466299
			9986	49921	321	0.643016
		(CGA-CCG)3-1	9988	55687	939	1.68621	1.56913	1.03913	0.0815085
			9984	54218	817	1.50688
			9988	51272	801	1.56226
			9993	46872	713	1.52116
	mbf1D	(AGA-CCA)3	9973	48962	36812	75.1848	73.4923	72.9623	5.11727
			9991	43694	34746	79.5212
			9997	49800	35764	71.8153
			9997	50900	34331	67.4479
		(CGA-CCG)3	9996	55552	2279	4.10246	7.40822	6.87822	2.73951
			9993	53563	3604	6.72853
			9997	53693	5725	10.6625
			9993	57756	4701	8.13941
		(AGA-CCA)3+1	9918	62284	308	0.494509	0.449654	0	0.10833
			9995	53433	309	0.578294
			9983	45419	152	0.334662
			9997	51898	203	0.391152
		(CGA-CCG)3+1	9995	46307	2998	6.47418	6.3831	5.8531	0.104662
			9998	50043	3132	6.25862
			9998	51148	3240	6.33456
			9998	51647	3339	6.46504
		(AGA-CCA)3-1	9993	52278	236	0.451433	0.387268	0	0.0785453
			9995	55014	233	0.423529
			9993	58463	160	0.273677
			9929	60934	244	0.400433
		(CGA-CCG)3-1	9981	49800	857	1.72088	1.59033	1.06033	0.103068
			9992	56643	853	1.50592
			8616	45419	738	1.62487
			9984	49680	750	1.50966
	asc1D mbf1D	(AGA-CCA)3	9970	35850	25702	71.6932	72.2178	71.6878	2.14394
			9983	43273	31869	73.6464
			9965	27872	19347	69.4137
			9970	36110	26764	74.118
		(CGA-CCG)3	9975	32958	3934	11.9364	10.4719	9.94191	2.73832
			9974	39004	4435	11.3706
			8499	29517	1888	6.39631
			9984	36547	4453	12.1843
		(AGA-CCA)3+1	9973	37984	531	1.39796	1.12171	0.591709	0.297441
			9968	35336	326	0.922572
			9960	39383	320	0.812533
			9603	35678	483	1.35378
		(CGA-CCG)3+1	9987	38910	8505	21.8581	22.192	21.662	0.742841
			9967	40540	8973	22.1337
			9973	38630	8318	21.5325
			9979	36023	8373	23.2435
		(AGA-CCA)3-1	9981	38537	244	0.633158	0.784764	0.254764	0.104839
			9987	42960	374	0.870577
			9972	35764	287	0.802483
			9965	35421	295	0.832839
		(CGA-CCG)3-1	9972	34663	1735	5.00534	4.30507	3.77507	0.469921
			9976	37348	1549	4.14748
			9973	36547	1473	4.03043
			9977	38444	1552	4.03704
	* RFP only Background = 0.53
	noBG*	background subtracted

## Sheet: F4S1B
	Source data for Figure 4-figure supplement 1B
	GFP/RFP fluorescence (x100) of GLN4 (1-99)-GFP reporters with (Arg-Ile)3 codon inserts (0, +1, and -1 frame) in wt, asc1D, mbf1D and asc1D mbf1D strains.
	Strain	Insert	Count	GFP Median	RFP Median	GFP/RFP	Average	noBG*	Std
	wt	(AGA-AUU)3	9760	20569	31945	64.3888	61.034	60.524	11.2636
			9574	23482	31114	75.4708
			9693	16966	33276	50.9857
			9521	17904	33597	53.2905
		(CGA-AUA)3	9739	7095	25948	27.3431	28.3311	27.8211	2.59699
			9839	6851	26196	26.1528
			9678	7512	27085	27.7349
			9613	7430	23151	32.0936
		(AGA-AUU)3+1	9908	99	24978	0.396349	0.41594	0	0.0190293
			9870	122	27673	0.440863
			9909	107	26259	0.407479
			9926	109	26010	0.41907
		(CGA-AUA)3+1	9805	126	27150	0.464088	0.462962	0	0.00773012
			9830	127	26828	0.473386
			9862	111	24218	0.458337
			9835	125	27410	0.456038
		(AGA-AUU)3-1	9821	102	23706	0.430271	0.499533	0	0.0824374
			9902	111	26010	0.426759
			9770	138	23763	0.580735
			9942	143	25519	0.560367
		(CGA-AUA)3-1	9888	112	26700	0.419476	0.411592	0	0.0232088
			9958	111	25824	0.429833
			9889	93.8	24334	0.385469
	asc1D	(AGA-AUU)3	9780	20472	29730	68.8597	70.0142	69.5042	4.9589
			9715	21210	30891	68.6608
			9862	19622	25458	77.076
			9844	18158	27739	65.4602
		(CGA-AUA)3	9908	7921	26637	29.7368	29.258	28.748	2.95006
			9868	8281	27085	30.5741
			9873	9054	28546	31.7172
			9878	6821	27280	25.0037
		(AGA-AUU)3+1	9888	202	29097	0.69423	0.681903	0.171903	0.0348354
			9815	211	29306	0.719989
			9839	181	26764	0.676282
			9851	194	30450	0.63711
		(CGA-AUA)3+1	9771	225	30450	0.738916	0.614463	0.104463	0.172941
			9912	165	24919	0.662145
			9905	188	26956	0.697433
			9764	88.7	24683	0.359357
		(AGA-AUU)3-1	9890	192	27673	0.693817	0.693494	0.183494	0.0143759
			9867	196	27476	0.71335
			9889	186	27085	0.686727
			9843	196	28820	0.680083
		(CGA-AUA)3-1	9843	207	28478	0.726877	0.728891	0.218891	0.0179513
			9805	216	28820	0.74948
			9890	200	27280	0.733138
			9902	194	27476	0.706071
	mbf1D	(AGA-AUU)3	9437	24742	28478	86.8811	85.4705	84.9605	4.02765
			9756	22395	27673	80.9273
			9817	17531	30670	57.1601
			9662	22079	24919	88.6031
		(CGA-AUA)3	9882	8467	26764	31.6358	33.1287	32.6187	2.75057
			9912	8135	27085	30.0351
			9667	7463	20813	35.8574
			9626	7562	21614	34.9866
		(AGA-AUU)3+1	9925	111	25948	0.427779	0.495703	0	0.098075
			9935	118	26259	0.44937
			7579	122	19031	0.641059
			9896	118	25398	0.464604
		(CGA-AUA)3+1	9907	173	27150	0.637201	0.618126	0.108126	0.0177729
			9921	155	25097	0.617604
			9913	166	26637	0.623193
			9932	155	26072	0.594508
		(AGA-AUU)3-1	9892	96.4	24276	0.3971	0.450163	0	0.0751102
			9483	147	26196	0.561154
			9904	95.1	22987	0.413712
			9840	95.1	22184	0.428687
		(CGA-AUA)3-1	9496	134	21210	0.631777	0.571757	0.061757	0.0525919
			9893	117	23206	0.50418
			9887	162	27806	0.582608
			9737	138	24276	0.568463
	asc1D mbf1D	(AGA-AUU)3	9737	16847	23261	72.4259	73.4687	72.9587	2.0306
			9543	16887	22987	73.4633
			9792	15419	21512	71.6763
			9800	16769	21975	76.3094
		(CGA-AUA)3	9895	4934	19529	25.265	25.5318	25.0218	0.373035
			9720	5556	21462	25.8876
			9842	4913	19031	25.8158
			9865	5224	20764	25.1589
		(AGA-AUU)3+1	9892	168	20184	0.832342	0.770388	0.260388	0.0512898
			9903	147	19995	0.735184
			9889	143	19807	0.721967
			9892	158	19948	0.792059
		(CGA-AUA)3+1	9877	552	20520	2.69006	2.79504	2.28504	0.111836
			9849	556	20042	2.77417
			9845	504	18243	2.7627
			9592	606	20520	2.95322
		(AGA-AUU)3-1	9893	158	19901	0.79393	0.995864	0.485864	0.306587
			8525	497	34249	1.45114
			9850	191	22770	0.838823
			9862	182	20232	0.899565
		(CGA-AUA)3-1	9902	259	19622	1.31995	1.33109	0.821094	0.0175322
			9844	267	19948	1.33848
			9828	271	20042	1.35216
			9926	259	19714	1.31379
	* RFP only Background = 0.51
	noBG*	background subtracted

## Sheet: F4S1C
	Source data for Figure 4-figure supplement 1C
	GFP/RFP x 100 values of Rluc-GFP reporters with TY1 inserts (in frame, +1 and -1 frame) in wt, asc1D, mbf1D and asc1D mbf1D strains.
	Strain	Frame	Count	GFP Median	RFP Median	GFP/RFP	Average	noBG*	Std
	wt	0	9978	6460	29517	21.8857	21.1704	20.6504	0.504551
			9978	6200	29944	20.7053
			9974	6502	30965	20.9979
			9982	5713	27085	21.0929
		+1	9932	443	29944	1.47943	1.76797	1.24797	0.206154
			9724	568	29659	1.9151
			9680	537	30523	1.75933
			9625	527	27476	1.91804
		-1	9498	190	28005	0.67845	0.56731	0.0473102	0.121403
			9576	187	28072	0.666144
			9900	134	29306	0.457244
			9908	136	29097	0.467402
	asc1D	0	9975	10388	27872	37.2704	37.1606	36.6406	0.453662
			9944	10179	27280	37.313
			9967	10318	27476	37.5528
			9975	10248	28072	36.5061
		+1	9977	784	30160	2.59947	2.59053	2.07053	0.079206
			9979	798	29588	2.69704
			9974	689	27410	2.51368
			9986	725	28410	2.55192
		-1	9981	192	29730	0.645812	0.743738	0.223738	0.411885
			9207	558	42036	1.32743
			9892	112	31263	0.358251
			9969	185	28751	0.643456
	mbf1D	0	9965	6146	27607	22.2625	22.8149	22.2949	0.556406
			9845	5774	24801	23.2813
			9828	5976	25641	23.3064
			9945	5787	25824	22.4094
		+1	9925	433	27739	1.56098	1.63569	1.11569	0.0737348
			9978	445	27806	1.60037
			9987	430	26072	1.64928
			9972	457	26384	1.73211
		-1	9972	131	26510	0.494153	0.471442	0	0.0535609
			9973	108	27085	0.398745
			9966	126	26892	0.468541
			9980	139	26510	0.52433
	asc1D mbf1D	0	9967	8226	24161	34.0466	34.484	33.964	0.823562
			9979	8467	25038	33.8166
			9970	8373	24334	34.4086
			9974	8355	23427	35.664
		+1	9984	636	26072	2.4394	2.51455	1.99455	0.152948
			9950	666	24919	2.67266
			9987	620	26510	2.33874
			9972	636	24392	2.60741
		-1	9982	179	26447	0.676825	0.673463	0.153463	0.0529298
			9981	155	24801	0.624975
			9968	168	26010	0.645905
			9958	182	24392	0.746146
	* RFP only Background = 0.52
	noBG*	background subtracted
