# Supplementary material for: Multi-protein bridging factor 1(Mbf1), Rps3 and Asc1 prevent stalled ribosomes from frameshifting
Source: eLife. 2018 Nov 22;7:e39637. doi: 10.7554/eLife.39637 (PMC6301793; doi:10.7554/eLife.39637)
Supplement: Figure 4—figure supplement 2—source data 2. [file elife-39637-fig4-figsupp2-data2.xlsx]

## Sheet: F4S2B
	Source data for Figure4-figure supplement 2B
	GFP/RFP x 100 values of GLN4-GFP reporters with (Arg-Arg)3 codon inserts (+1 frame) with either CGA-CGG (I) or AGA-AGA (O) at each position in wt, asc1D, mbf1D and asc1D mbf1D strains
	Strain	Insert	Count	RFP Median	GFP Median	GFP/RFP	average	noBG*	std
	wt	OOO	9990	46532	192	0.412619	0.383726	0	0.0460558
			9995	42036	181	0.430583
			9995	47789	158	0.33062
			9988	45419	164	0.361082
		III	9997	46195	253	0.547678	0.608176	0.068176	0.132965
			9998	40054	234	0.584211
			9996	45199	226	0.500011
			9996	41833	335	0.800803
		IIO	9994	38630	185	0.478902	0.459119	0	0.0229762
			9995	45419	213	0.468967
			9995	41531	177	0.426188
			9996	44981	208	0.462417
		IOI	9995	47443	221	0.465822	0.576914	0.0369138	0.139262
			9993	38352	205	0.534522
			9995	43483	229	0.526643
			9993	41631	325	0.780668
		OII	9996	41732	149	0.35704	0.333677	0	0.0364315
			9998	44981	158	0.351259
			9870	46532	130	0.279378
			9997	43800	152	0.347032
		IOO	9994	42857	183	0.427001	0.420829	0	0.0115049
			9994	42444	177	0.41702
			9994	42753	185	0.432718
			9995	44764	182	0.406577
		OIO	9994	46307	166	0.358477	0.345062	0	0.0286098
			9992	41833	149	0.356178
			9994	45639	138	0.302373
			9994	47905	174	0.363219
		OOI	9993	44981	148	0.329028	0.356998	0	0.0308015
			9997	38167	146	0.382529
			9991	48843	162	0.331675
			9997	39765	153	0.38476
	asc1D	OOO	9990	41331	216	0.52261	0.513028	0	0.0318523
			9991	41833	228	0.545024
			9987	44333	208	0.469176
			9983	44440	229	0.515302
		III	9986	39861	6777	17.0016	17.1011	16.5611	0.304751
			9988	42753	7496	17.5333
			9992	41431	7064	17.05
			9990	38075	6404	16.8194
		IIO	9982	43906	5874	13.3786	12.8994	12.3594	0.467788
			9972	43800	5787	13.2123
			9973	49559	6240	12.5911
			9978	47214	5862	12.4158
		IOI	9847	62436	5787	9.26869	11.4007	10.8607	1.64478
			9965	45972	6080	13.2254
			9979	53045	6294	11.8654
			9954	53045	5964	11.2433
		OII	9959	46872	332	0.708312	0.511092	0	0.209112
			9963	47099	318	0.675174
			9798	44764	151	0.337325
			9812	47905	155	0.323557
		IOO	9955	46532	5874	12.6236	13.4367	12.8967	0.747455
			9981	43378	5737	13.2256
			9980	39193	5652	14.4209
			9973	44440	5989	13.4766
		OIO	9973	48607	278	0.571934	0.511513	0	0.122217
			9971	45419	241	0.530615
			9821	59179	198	0.334578
			9951	47789	291	0.608927
		OOI	9879	53045	281	0.529739	0.596283	0.0562829	0.0620324
			9979	43064	241	0.559632
			9979	47673	316	0.662849
			9991	47558	301	0.632911
	mbf1D	OOO	9990	46307	202	0.436219	0.411084	0	0.031163
			9985	49081	205	0.417677
			9978	49921	212	0.424671
			9989	42650	156	0.365768
		III	9990	40933	10318	25.207	25.3639	24.8239	1.59108
			9991	39383	9156	23.2486
			9993	43273	11248	25.9931
			9995	45529	12296	27.007
		IIO	9997	43169	7301	16.9126	17.0648	16.5248	0.687924
			9994	43169	7680	17.7905
			9992	42960	7463	17.372
			9984	38723	6267	16.1842
		IOI	9997	41531	6957	16.7513	17.0446	16.5046	1.02918
			9994	46307	8262	17.8418
			9993	42753	6718	15.7135
			9984	44226	7904	17.8718
		OII	9986	44872	905	2.01685	2.24456	1.70456	0.25672
			9991	47789	1069	2.23692
			9995	37079	966	2.60525
			9990	42138	893	2.11923
		IOO	9988	42753	5976	13.978	14.0775	13.5375	0.123909
			9990	43694	6173	14.1278
			9990	39383	5604	14.2295
			9997	41231	5762	13.9749
		OIO	9991	41431	181	0.436871	0.435418	0	0.0435058
			9991	45419	187	0.411722
			9989	42547	169	0.397208
			9989	42753	212	0.495872
		OOI	9986	40736	257	0.630892	0.658509	0.118509	0.0415386
			9995	41132	254	0.617524
			9996	41531	282	0.679011
			9981	46985	332	0.706608
	asc1D mbf1D	OOO	9958	33436	229	0.684891	0.72678	0.18678	0.0432905
			9903	36197	257	0.710004
			9861	40933	297	0.725576
			9874	40933	322	0.786651
		III	9912	40835	10110	24.7582	25.0121	24.4721	0.766618
			9906	42239	10156	24.0441
			9694	38444	9884	25.7101
			9961	33678	8600	25.536
		IIO	9824	44764	8953	20.0004	20.7345	20.1945	0.638689
			9576	47789	7731	16.1774	OUTLIER
			9774	46872	9862	21.0403
			9701	45972	9729	21.1629
		IOI	9732	50043	7817	15.6206	15.7321	15.1921	0.345738
			9850	49319	7765	15.7444
			9540	41032	6645	16.1947
			9835	46985	7221	15.3687
		OII	9917	47443	4125	8.69464	8.88487	8.34487	0.503729
			9870	49439	4099	8.29103
			9080	38817	3671	9.4572
			9540	39861	3626	9.09661
		IOO	9693	50408	6335	12.5674	12.5998	12.0598	0.130042
			9581	44981	5592	12.4319
			9208	40442	5147	12.7269
			9467	38444	4872	12.673
		OIO	9957	47673	750	1.57322	1.66402	1.12402	0.0868612
			9875	50408	869	1.72393
			9840	52532	920	1.75131
			9938	48021	772	1.60763
		OOI	9757	46532	1410	3.03017	2.76069	2.22069	0.203935
			9808	47443	1320	2.78229
			9925	46645	1188	2.5469
			9904	47328	1270	2.6834
	* RFP only Background = 0.54
	noBG*	background subtracted

## Sheet: F4S2C
		Source data for Figure4-figure supplement 2C
		GFP/RFP fluorescence (x100) of GLN4 (1-99)-GFP reporters with (Arg-Arg)3 codon inserts (0, +1, and -1 frame) in wt, asc1D, mbf1D and asc1D mbf1D strains.
		Strain	Insert	Count	GFP Median	RFP Median	GFP/RFP	average	noBG*	std
1		wt	(AGA-AGA)3	9907	25277	74065	34.1281	OUTLIER
2				9980	30305	48725	62.196	62.5154	61.9654	4.82207
3				9977	24978	43169	57.861
4				9982	32409	48021	67.4892
5			(CGA-CGG)3	9969	5381	50777	10.5973	14.8992	14.3492	2.93895
6				9877	6645	42239	15.7319
7				9846	8392	48725	17.2232
8				9972	7612	47443	16.0445
9			(AGA-AGA)3+1	9980	194	52024	0.372905	0.407305	0	0.0332059
10				9989	204	52405	0.389276
11				9986	194	46307	0.418943
12				9981	187	41732	0.448097
13			(CGA-CGG)3+1	9974	270	46307	0.583065	0.653097	0.103097	0.128276
14				9956	329	49319	0.667086
15				9981	271	50653	0.535013
16				9982	325	39288	0.827225
17			(AGA-AGA)3-1	9989	178	50653	0.351411	0.36918	0	0.0430024
18				9990	164	51772	0.316774
19				9981	220	54881	0.400867
20				9987	205	50286	0.407668
21			(CGA-CGG)3-1	9967	234	51397	0.455279	0.43793	0	0.0235846
22				9976	238	53955	0.441108
23				9983	208	51521	0.403719
24				9974	226	50043	0.451612
25		asc1D	(AGA-AGA)3	9973	25702	51397	50.0068	49.5647	49.0147	0.388017
26				9980	22987	46645	49.2807
27				9908	11273	44872	25.1226	OUTLIER
28				9967	25641	51898	49.4065
29			(CGA-CGG)3	9975	17085	53563	31.897	33.0645	32.5145	1.36296
30				9977	19120	55282	34.5863
31				9984	16652	52151	31.9304
32				9975	17779	52532	33.8441
33			(AGA-AGA)3+1	9950	616	43906	1.403	OUTLIER
34				9985	350	49921	0.701108	0.578222	0.0282222	0.106487
35				9985	253	48607	0.520501
36				9988	244	47558	0.513058
37			(CGA-CGG)3+1	9976	15856	91412	17.3456	17.7269	17.1769	1.09655
38				9983	8716	52788	16.5113
39				9982	9996	52278	19.1209
40				9986	9534	53174	17.9298
41			(AGA-AGA)3-1	9977	277	45419	0.609877	0.634283	0.0842826	0.0784437
42				9978	306	46307	0.660807
43				9983	254	46985	0.540598
44				9967	365	50286	0.725848
45			(CGA-CGG)3-1	9984	426	54747	0.778125	0.777171	0.227171	0.103863
46				9985	406	54747	0.741593
47				9991	381	56781	0.670999
48				9977	583	63510	0.917966
49		mbf1D	(AGA-AGA)3	9990	20911	42444	49.2673	52.4947	51.9447	3.00459
50				9986	22448	43378	51.7497
51				9978	24276	42960	56.5084
52				9991	21060	40150	52.4533
53			(CGA-CGG)3	9991	3089	45309	6.81763	8.74108	8.19108	1.28716
54				9991	5093	53955	9.43935
55				9995	4662	50531	9.22602
56				9985	4791	50531	9.48131
57			(AGA-AGA)3+1	9985	313	54482	0.574502	0.476904	0	0.0739045
58				9980	186	47099	0.394913
59				9990	259	54881	0.47193
60				9996	225	48255	0.466273
61			(CGA-CGG)3+1	9990	11666	47099	24.7691	26.5447	25.9947	1.8901
62				9992	11990	45750	26.2077
63				9984	15348	52532	29.2165
64				9993	13388	51521	25.9855
65			(AGA-AGA)3-1	9988	234	51898	0.450884	0.444919	0	0.0273607
66				9993	216	50777	0.425389
67				9985	254	52788	0.48117
68				9975	196	46420	0.422232
69			(CGA-CGG)3-1	9991	246	45972	0.535108	0.551631	0.00163128	0.0606978
70				9996	253	50531	0.500683
71				9994	255	48021	0.531018
72				9988	332	51898	0.639716
73		asc1D mbf1D	(AGA-AGA)3	9958	23206	40442	57.3809	56.6566	56.1066	0.791784
74				9981	22079	39099	56.4695
75				9981	22079	38630	57.1551
76				9955	22878	41132	55.6209
77			(CGA-CGG)3	9974	8262	43588	18.9548	18.8377	18.2877	0.227225
78				9987	8244	43378	19.005
79				9990	8027	43378	18.5048
80				9989	7939	42036	18.8862
81			(AGA-AGA)3+1	9979	340	40054	0.848854	0.77853	0.22853	0.0570084
82				9967	322	40247	0.80006
83				9987	291	40150	0.724782
84				9983	312	42138	0.740424
85			(CGA-CGG)3+1	9996	10294	42342	24.3116	24.5107	23.9607	0.446003
86				9990	10271	41132	24.9708
87				9992	10156	42342	23.9856
88				9991	10364	41833	24.7747
89			(AGA-AGA)3-1	9974	322	41531	0.775324	0.792067	0.242067	0.0495452
90				9970	399	46084	0.86581
91				9980	302	39383	0.766828
92				9978	306	40247	0.760305
93			(CGA-CGG)3-1	9985	660	41732	1.58152	1.5838	1.0338	0.0414897
94				9988	687	43800	1.56849
95				9981	685	41732	1.64143
96				9990	660	42753	1.54375
		* RFP only Background = 0.55
		noBG*	background subtracted

## Sheet: F4S2D
	Source data for Figure4-figure supplement 2D
	GFP/RFP fluorescence (x100) of revised GLN4 (1-99)-GFP reporters with (Arg-Arg)3 codon inserts (0, +1, and -1 frame) in wt, asc1D, mbf1D and asc1D mbf1D strains.
	Strain	Insert	Count	Median GFP	Median RFP	GFP/RFP	noBG*	average	std
	wt	(AGA-AGA)3	5902	15065	24624	61.1801	60.7401	59.7628	0.762778
			5843	15419	25702	59.9914	59.5514
			5561	14788	24919	59.3443	58.9043
			5857	15277	25337	60.2952	59.8552
		(CGA-CGG)3	6384	5604	22932	24.4375	23.9975	23.8848	1.11043
			6405	5652	22395	25.2378	24.7978
			6602	5313	23371	22.7333	22.2933
			6081	6028	24218	24.8906	24.4506
		(AGA-AGA)3+1	6220	89.9	25458	0.353131	0	0	0
			5800	95.1	25038	0.379823	0
			4835	100	24860	0.402253	0
			6144	89.9	24978	0.359917	0
		(CGA-CGG)3+1	5944	122	25886	0.471297	0.0312972	0.0397527	0.00995975
			5927	118	24801	0.475787	0.0357873
			5769	127	25702	0.494125	0.054125
			6209	113	23650	0.477801	0.0378013
		(AGA-AGA)3-1	6409	91.2	24218	0.376579	0	0	0
			6571	77.1	22987	0.335407	0
			6175	91.2	25337	0.359948	0
			3946	134	35251	0.380131	0
		(CGA-CGG)3-1	5823	108	24801	0.435466	-0.00453369	-0.00113342	0.00226684
			6058	104	24218	0.429433	0
			6613	89.9	23371	0.384665	0
			6304	97.7	25519	0.382852	0
	asc1D	(AGA-AGA)3	5697	8834	19075	46.3119	45.8719	46.0029	1.37965
			5338	9301	19301	48.1892	47.7492
			4748	9555	20569	46.4534	46.0134
			5759	8794	19622	44.817	44.377
		(CGA-CGG)3	5220	7446	19256	38.6685	38.2285	39.1546	0.912071
			5021	7782	19901	39.1036	38.6636
			5005	7939	19484	40.7463	40.3063
			5500	7748	19438	39.8601	39.4201
		(AGA-AGA)3+1	5525	93.8	20089	0.466922	0.0269222	0.0481157	0.0247686
			5466	95.1	19714	0.482398	0.0423983
			5462	99	18897	0.523893	0.0838927
			5498	92.5	19301	0.47925	0.0392498
		(CGA-CGG)3+1	5029	289	20715	1.39512	0.955124	0.933934	0.0800652
			4850	297	20715	1.43374	0.993744
			5650	250	19901	1.25622	0.816218
			5365	271	19211	1.41065	0.97065
		(AGA-AGA)3-1	5597	99	19576	0.505721	0.0657213	0.0704641	0.00626175
			136	113	18329	0.616509	0.176509	NO GROWTH
			5435	99	19484	0.508109	0.0681092
			5074	103	19901	0.517562	0.0775619
		(CGA-CGG)3-1	5664	102	20089	0.507741	0.0677406	0.155465	0.0621741
			4821	122	20327	0.600187	0.160187
			4393	135	20715	0.651702	0.211702
			4452	125	20089	0.622231	0.182231
	mbf1D	(AGA-AGA)3	2510	9996	17205	58.0994	57.6594	61.6116	2.84815
			6218	14584	23261	62.6972	62.2572
			5429	15384	23706	64.895	64.455
			4722	14926	23876	62.5147	62.0747
		(CGA-CGG)3	6010	4872	20911	23.2987	22.8587	22.7367	0.552
			6113	4882	20424	23.9033	23.4633
			5037	4751	20813	22.8271	22.3871
			6056	4731	20862	22.6776	22.2376
		(AGA-AGA)3+1	6805	77.1	23594	0.326778	0	0.0168803	0.0337607
			5746	103	24624	0.418291	0
			5597	111	21871	0.507521	0.0675214
			6557	84.8	21310	0.397935	0
		(CGA-CGG)3+1	6145	1136	23594	4.81478	4.37478	4.72015	0.391904
			6670	1074	21923	4.89896	4.45896
			4446	974	18545	5.25209	4.81209
			4918	1132	19948	5.67475	5.23475
		(AGA-AGA)3-1	4856	121	19668	0.615213	0.175213	0.0973274	0.0874488
			4985	127	20862	0.608762	0.168762
			6085	104	23371	0.444996	0.00499594
			6178	118	24566	0.480339	0.0403387
		(CGA-CGG)3-1	6649	123	23876	0.515162	0.0751617	0.201292	0.0984647
			5142	177	24334	0.727377	0.287377
			5298	171	24046	0.711137	0.271137
			6006	146	23876	0.611493	0.171493
	asc1D mbf1D	(AGA-AGA)3	5019	10364	20327	50.9864	50.5464	51.2558	0.925457
			4920	10318	19622	52.5838	52.1438
			5196	10019	19120	52.4006	51.9606
			5355	10041	19761	50.8122	50.3722
		(CGA-CGG)3	5340	3894	17205	22.633	22.193	22.6137	0.493744
			5862	3678	16230	22.6617	22.2217
			5661	3847	16268	23.6477	23.2077
			5697	4099	17613	23.2726	22.8326
		(AGA-AGA)3+1	6001	113	19668	0.574537	0.134537	0.165918	0.0482593
			5520	129	19031	0.677841	0.237841
			5668	120	20424	0.587544	0.147544
			5774	114	19529	0.583747	0.143747
		(CGA-CGG)3+1	5157	2236	16808	13.3032	12.8632	12.3548	0.764132
			3995	2718	23316	11.6572	11.2172
			5019	2297	17490	13.1332	12.6932
			5827	2262	17286	13.0857	12.6457
		(AGA-AGA)3-1	5090	140	20089	0.696899	0.256899	0.217718	0.0366604
			5541	127	19854	0.63967	0.19967
			5711	122	19807	0.615944	0.175944
			5330	135	19901	0.678358	0.238358
		(CGA-CGG)3-1	5342	270	17820	1.51515	1.07515	1.04746	0.0497171
			5839	262	17205	1.52281	1.08281
			5456	257	17165	1.49723	1.05723
			5905	248	17531	1.41464	0.974637
	* RFP only Background = 0.44
	noBG*	background subtracted

## Sheet: F4S2E
	Source data for Figure4-figure supplement 2E
	GFP/RFP x 100 values of GLN4-GFP reporters with yeast native gene sequences containing CGA-CGG codon pair (in frame or +1 frame) in wt, asc1D, mbf1D and asc1D mbf1D strains
	gene	strain	frame	Count	Median GFP	Median RFP	GFP/RFP*100	noBG*	Average	std
	CUP2	wt	0	5488	42960	91636	46.8811	46.4111	40.7567	9.15639
				5570	11613	22770	51.0013	50.5313
				5939	8620	24566	35.0891	34.6191
				6073	7446	23316	31.9352	31.4652
			+1	6494	129	24624	0.523879	0.0538791	0	0.158209
				5633	32.1	21160	0.151701	-0.318299
				4949	102	36724	0.277748	-0.192252
				6753	100	25948	0.385386	-0.0846138
		asc1D	0	5954	8208	22608	36.3057	35.8357	39.3986	9.38314
				6018	8010	23261	34.4353	33.9653
				5665	8600	24683	34.8418	34.3718
				5883	13114	24334	53.8917	53.4217
			+1	5392	281	25886	1.08553	0.615529	0.551403	0.0485812
				4957	254	25886	0.981225	0.511225
				5016	279	27021	1.03253	0.56253
				5060	259	26259	0.986328	0.516328
		mbf1D	0	6493	8677	24334	35.6579	35.1879	43.7722	15.1334
				6126	16691	24978	66.8228	66.3528
				6110	10364	26637	38.9083	38.4383
				6587	8658	24334	35.5798	35.1098
			+1	5853	298	27215	1.09498	0.624984	0.68155	0.125972
				6102	286	26637	1.07369	0.603694
				5294	369	27541	1.33982	0.869821
				5787	291	26510	1.0977	0.627699
		asc1D mbf1D	0	6233	6762	20911	32.337	31.867	32.0885	0.666489
				5922	7003	21160	33.0955	32.6255
				6588	6616	19995	33.0883	32.6183
				6889	6616	20862	31.7132	31.2432
			+1	6695	801	20715	3.86676	3.39676	3.58682	0.169203
				6539	823	20764	3.96359	3.49359
				6435	893	21160	4.22023	3.75023
				6628	849	20327	4.17671	3.70671
	FCP1	wt	0	5564	21563	34830	61.9093	61.3593	62.5119	4.56884
				6319	23594	34414	68.5593	68.0093
				6641	19075	33116	57.6006	57.0506
				5824	21666	33759	64.1784	63.6284
			+1	6375	126	36284	0.347261	-0.202739	0	0.0282354
				6685	138	33276	0.414713	-0.135287
				6720	131	33436	0.391793	-0.158207
				6811	131	33436	0.391793	-0.158207
		asc1D	0	5506	17572	32176	54.6121	54.0621	53.7917	2.65592
				5342	17988	31640	56.8521	56.3021
				2	866	8600	10.0698	9.51977	NO GROWTH
				5650	16004	31039	51.5609	51.0109
			+1	12	329	22716	1.44832	0.898318	NO GROWTH
				4199	233	31716	0.734645	0.184645	0.0400826	0.140526
				5643	134	29517	0.453976	-0.0960243
				5753	175	30088	0.581627	0.0316272
		mbf1D	0	6782	19948	32958	60.5255	59.9755	52.5813	11.0989
				7151	19576	31263	62.6172	62.0672
				7189	16926	33116	51.1112	50.5612
				6903	12553	32800	38.2713	37.7213
			+1	7023	168	35251	0.476582	-0.0734178	0	0.0303646
				7096	135	33356	0.404725	-0.145275
				6663	139	32409	0.428893	-0.121107
				6929	140	31263	0.447814	-0.102186
		asc1D mbf1D	0	5891	17449	29306	59.5407	58.9907	59.1442	1.92785
				5575	17779	29027	61.2499	60.6999
				6406	15819	27739	57.028	56.478
				5831	17737	29097	60.9582	60.4082
			+1	6231	208	27410	0.758847	0.208847	0.244578	0.0315048
				6017	233	27939	0.83396	0.28396
				6108	216	27541	0.784285	0.234285
				5887	226	28207	0.80122	0.25122
	PHO4	wt	0	6854	10530	32331	32.5694	32.0194	34.3858	3.18994
				6765	10945	33276	32.8916	32.3416
				6737	11222	32253	34.7937	34.2437
				6187	13235	33516	39.4886	38.9386
			+1	6741	133	33356	0.398729	-0.151271	0	0.0249007
				6910	126	32958	0.382305	-0.167695
				6871	138	32958	0.418715	-0.131285
				6650	123	34167	0.359996	-0.190004
		asc1D	0	5683	9513	30523	31.1667	30.6167	29.8174	2.83651
				6102	9054	30305	29.8763	29.3263
				5869	9620	28614	33.6199	33.0699
				6070	8027	29944	26.8067	26.2567
			+1	5556	208	29517	0.704679	0.154679	0.0510828	0.0924664
				5911	158	30670	0.515161	-0.0348386
				5885	151	28410	0.531503	-0.018497
				5641	190	29097	0.652988	0.102988
		mbf1D	0	6145	13606	32721	41.5819	41.0319	37.1168	3.39067
				6682	11639	32564	35.7419	35.1919
				6811	12073	33840	35.6767	35.1267
				6989	13083	30891	42.3521	41.8021
			+1	6872	205	31489	0.651021	0.101021	0.0188703	0.0916582
				6433	205	34249	0.598558	0.0485576
				6678	200	34003	0.588183	0.0381834
				7123	151	34497	0.437719	-0.112281
		asc1D mbf1D	0	6207	9054	26510	34.1531	33.6031	35.2224	2.00657
				6444	9817	25398	38.6526	38.1026
				6313	9034	25398	35.5697	35.0197
				6991	9470	27280	34.7141	34.1641
			+1	6536	486	25458	1.90903	1.35903	1.20711	0.113715
				6731	473	27021	1.75049	1.20049
				6917	447	25763	1.73505	1.18505
				6791	427	26134	1.63389	1.08389
	RAD54	wt	0	5693	12904	29306	44.0319	43.5919	40.9938	2.93755
				6013	12669	30088	42.1065	41.6665
				5938	13669	32253	42.3806	41.9406
				5870	11719	31489	37.2162	36.7762
			+1	6059	111	30743	0.361058	-0.0789422	0	0.0174307
				5669	120	30891	0.388463	-0.0515373
				6149	113	29659	0.380997	-0.0590027
				5833	117	33356	0.350761	-0.0892385
		asc1D	0	5184	8755	26700	32.7903	32.3503	31.1947	3.30826
				5220	7333	27215	26.9447	26.5047
				5106	9259	26700	34.6779	34.2379
				5185	8336	25948	32.1258	31.6858
			+1	5019	111	26259	0.422712	-0.0172878	0.0222735	0.0365178
				4978	127	26072	0.487113	0.0471126
				5070	131	26259	0.498877	0.0588766
				5146	114	25886	0.440392	0.00039249
		mbf1D	0	6317	10225	30160	33.9025	33.4625	33.6179	8.04871
				6648	7033	30305	23.2074	22.7674
				6326	10920	29730	36.7306	36.2906
				5905	12101	28546	42.3912	41.9512
			+1	5972	121	30670	0.394522	-0.0454777	0	0.0329623
				6337	107	30016	0.356477	-0.0835235
				6074	130	30377	0.427955	-0.0120446
				6382	108	29801	0.362404	-0.0775961
		asc1D mbf1D	0	6230	9115	24508	37.1919	36.7519	32.9856	7.67197
				6435	8736	23989	36.4167	35.9767
				6342	8620	22608	38.1281	37.6881
				6093	5592	25458	21.9656	21.5256
			+1	6388	262	23650	1.10782	0.667822	0.632359	0.103107
				6176	265	22079	1.20024	0.760236
				6312	233	24046	0.968976	0.528976
				6347	240	23706	1.0124	0.572402
	GPT2	wt	0	5948	6926	31338	22.101	21.661	24.7405	2.15858
				6298	7782	30670	25.3733	24.9333
				5926	8794	32564	27.0053	26.5653
				5723	8010	30523	26.2425	25.8025
			+1	5992	111	32879	0.337602	-0.102398	0	0.122265
				4295	142	23482	0.604719	0.164719
				5588	125	30523	0.409527	-0.0304728
				6182	103	28889	0.356537	-0.0834629
		asc1D	0	5326	6308	26764	23.569	23.129	21.1625	3.55544
				5482	6531	26828	24.344	23.904
				5184	4623	28072	16.4684	16.0284
				5316	5812	26384	22.0285	21.5885
			+1	5115	113	26010	0.434448	-0.00555171	0.00722295	0.0447329
				4930	104	26573	0.391375	-0.0486253
				4947	130	26259	0.495068	0.0550684
				4992	120	25641	0.468	0.0280005
		mbf1D	0	6256	6911	29588	23.3574	22.9174	24.8181	1.90779
				6068	7333	29377	24.9617	24.5217
				6009	7446	30016	24.8068	24.3668
				6071	8600	30817	27.9067	27.4667
			+1	6383	183	30232	0.605319	0.165319	0.169682	0.118884
				6210	204	29730	0.686176	0.246176
				6474	219	31114	0.703863	0.263863
				6231	143	32253	0.44337	0.00336961
		asc1D mbf1D	0	6439	5556	23482	23.6607	23.2207	22.7504	0.431091
				6181	5688	24450	23.2638	22.8238
				6394	5427	23371	23.2211	22.7811
				6425	5336	23594	22.6159	22.1759
			+1	6393	718	22987	3.1235	2.6835	2.47393	0.171091
				6565	596	21975	2.71217	2.27217
				5995	394	13357	2.94976	2.50976
				6428	674	23482	2.87028	2.43028
	ARG81	wt	0	6224	13419	30891	43.4398	42.9998	44.5123	5.11941
				6009	11639	30232	38.4989	38.0589
				5960	15171	31793	47.7181	47.2781
				5619	16769	33436	50.1525	49.7125
			+1	1673	207	31869	0.649534	0.209534	0	0.160061
				6121	113	32958	0.342861	-0.0971394
				6622	109	31945	0.341211	-0.0987885
				5967	93.8	30377	0.308786	-0.131214
		asc1D	0	5186	13204	26010	50.7651	50.3251	48.2068	3.13566
				5219	11197	25458	43.9822	43.5422
				5281	12101	24276	49.8476	49.4076
				5282	12727	25458	49.9921	49.5521
			+1	4962	139	25763	0.539533	0.0995334	0.0643838	0.107959
				4452	158	24801	0.637071	0.197071
				4981	113	24978	0.452398	0.0123981
				4802	103	26510	0.388533	-0.0514674
		mbf1D	0	6095	10133	29236	34.6593	34.2193	42.3392	5.71024
				5610	14652	30597	47.887	47.447
				5646	13023	29944	43.4912	43.0512
				5766	13023	28889	45.0794	44.6394
			+1	6262	103	29097	0.353988	-0.0860116	0	0.0258487
				5845	123	31640	0.388748	-0.0512516
				5984	103	30377	0.339072	-0.100928
				6113	120	30670	0.391262	-0.0487382
		asc1D mbf1D	0	6203	12410	24801	50.0383	49.5983	44.2534	7.92205
				5846	8010	24334	32.9169	32.4769
				6156	10970	23096	47.4974	47.0574
				6323	11455	23706	48.3211	47.8811
			+1	6236	194	22824	0.849982	0.409982	0.529306	0.0809892
				6013	242	23650	1.02326	0.583256
				6157	232	23482	0.987991	0.547991
				6335	242	23819	1.016	0.575996
	noBG*	background subtracted
