# Supplementary material for: Multi-protein bridging factor 1(Mbf1), Rps3 and Asc1 prevent stalled ribosomes from frameshifting
Source: eLife. 2018 Nov 22;7:e39637. doi: 10.7554/eLife.39637 (PMC6301793; doi:10.7554/eLife.39637)
Supplement: Figure 4—source data 1. [file elife-39637-fig4-data1.xlsx]

## Sheet: 4A
	Source data for 4A
	GFP/RFP x 100 values of GLN4-GFP reporters with inhibitory codon pair inserts (+1 frame) in mbf1D and asc1D mbf1D strains.
	Strain	Insert	Count	Median GFP	Median RFP	GFP/RFP*100	No BG	average	std
	mbf1D	(AGG-CGA)3+1	5597	99	24334	0.406838	0.0168382	0.00309485	0.0216344
			5626	91.2	24860	0.366854	-0.0231456
			5473	103	24860	0.41432	0.0243202
			5922	95.1	24742	0.384367	-0.00563334
		(CGA-AUA)3+1	6015	126	24450	0.515337	0.125337	0.0990169	0.0196534
			6028	109	22502	0.484401	0.0944014
			6023	118	24161	0.48839	0.0983904
			5918	118	25217	0.467938	0.0779383
		(CGA-CCG)3+1	5462	1373	24624	5.57586	5.18586	5.3492	0.251505
			5756	1353	22289	6.07026	5.68026
			5673	1358	24624	5.51494	5.12494
			5803	1397	24104	5.79572	5.40572
		(CGA-CGA)3+1	5678	1549	23876	6.48769	6.09769	5.93823	0.122555
			5625	1549	24508	6.32039	5.93039
			5938	1526	24161	6.31596	5.92596
			5808	1506	24334	6.18887	5.79887
		(CGA-CGG)3+1	5870	5701	21666	26.3131	25.9231	26.2363	0.499879
			6133	6186	22770	27.1673	26.7773
			6005	5874	21820	26.9203	26.5303
			5920	5874	22502	26.1043	25.7143
		(CGA-CUG)3+1	5968	105	21975	0.477816	0.0878157	0.0979331	0.014436
			5560	125	24742	0.505214	0.115214
			5919	120	24276	0.494315	0.104315
			6067	104	21923	0.474388	0.0843876
		(CGA-GCG)3+1	5746	142	24334	0.583546	0.193546	0.168583	0.0243574
			6632	117	21871	0.534955	0.144955
			6483	130	24046	0.54063	0.15063
			5815	122	21210	0.5752	0.1852
		(CUC-CCG)3+1	5712	220	24919	0.88286	0.49286	0.522839	0.0773134
			6205	211	24104	0.875373	0.485373
			5879	215	24860	0.864843	0.474843
			5962	212	20617	1.02828	0.638278
		(CUG-CCG)3+1	5956	92.5	21871	0.422934	0.0329345	0.0147737	0.0364248
			5690	105	24161	0.434585	0.0445847
			5725	91.2	22289	0.40917	0.0191704
			6121	87.4	24801	0.352405	-0.0375949
		(CUG-CGA)3+1	6036	97.7	24801	0.393936	0.00393573	0.00590649	0.0151765
			5971	99	24742	0.400129	0.0101293
			5782	97.7	25948	0.376522	-0.0134777
			5991	92.5	22395	0.413039	0.0230386
		(GUA-CGA)3+1	6169	95.1	24860	0.382542	-0.00745776	0	0.0525926
			6418	74.5	23989	0.310559	-0.079441
			5777	105	25580	0.410477	0.0204769
			6208	100	23206	0.430923	0.040923
		(GUG-CGA)3+1	6314	83.5	24392	0.342325	-0.0476746	0	0.0358461
			6538	84.8	24624	0.344379	-0.0456205
			5718	102	24334	0.419167	0.0291666
			6036	89.9	24742	0.36335	-0.0266502
	asc1D mbf1D	(AGG-CGA)3+1	5512	114	20137	0.566122	0.176122	0.186522	0.0184197
			5396	116	19714	0.588414	0.198414
			5480	116	19484	0.59536	0.20536
			5577	112	20137	0.55619	0.16619
		(CGA-AUA)3+1	5507	434	19484	2.22747	1.83747	1.80084	0.0333442
			5395	391	17946	2.17876	1.78876
			5060	426	19807	2.15075	1.76075
			5588	436	19761	2.20637	1.81637
		(CGA-CCG)3+1	5204	3731	19901	18.7478	18.3578	18.8221	0.312892
			5291	3878	20089	19.3041	18.9141
			5537	3918	20184	19.4114	19.0214
			5286	3777	19484	19.3851	18.9951
		(CGA-CGA)3+1	5039	2665	19714	13.5183	13.1283	13.0614	0.33229
			5291	2236	17246	12.9653	12.5753
			5057	2650	19347	13.6972	13.3072
			5055	2686	19714	13.6248	13.2348
		(CGA-CGG)3+1	5591	4193	17654	23.751	23.361	23.5642	0.380354
			5196	4731	20042	23.6054	23.2154
			5021	4791	19576	24.4738	24.0838
			4961	4751	19807	23.9865	23.5965
		(CGA-CUG)3+1	5588	225	19529	1.15213	0.762133	0.786155	0.0192187
			5638	230	19668	1.16941	0.779412
			5088	241	20184	1.19402	0.804015
			4917	240	20184	1.18906	0.799061
		(CGA-GCG)3+1	5496	367	18941	1.9376	1.5476	1.5689	0.0231122
			5554	374	18941	1.97455	1.58455
			5442	365	18808	1.94066	1.55066
			5285	355	17904	1.9828	1.5928
		(CUC-CCG)3+1	5050	313	20666	1.51456	1.12456	1.17476	0.0392906
			5344	306	19576	1.56314	1.17314
			4965	313	19438	1.61025	1.22025
			5511	309	19668	1.57108	1.18108
		(CUG-CCG)3+1	5308	138	19392	0.711634	0.321634	0.304358	0.046747
			5327	135	19995	0.675169	0.285169
			5061	144	19211	0.749571	0.359571
			6032	122	19031	0.641059	0.251059
		(CUG-CGA)3+1	5447	123	20042	0.613711	0.223711	0.243355	0.0273504
			5591	126	19576	0.643645	0.253645
			5230	135	20232	0.66726	0.27726
			5821	109	17904	0.608803	0.218803
		(GUA-CGA)3+1	5198	125	19438	0.64307	0.25307	0.256372	0.029388
			5306	127	18720	0.678419	0.288419
			5450	116	19075	0.608126	0.218126
			5183	126	19211	0.655874	0.265874
		(GUG-CGA)3+1	5307	117	19484	0.600493	0.210493	0.228511	0.0283888
			5517	111	18853	0.588766	0.198766
			5158	129	19901	0.648209	0.258209
			5381	122	19165	0.636577	0.246577
	* RFP only Background = 0.39
	noBG*	background subtracted

## Sheet: 4B
	Source data for 4B
	GFPFLOW ratio (I/O) of GLN4-GFP reporters with inhibitory codon pair inserts (in frame) in wt and asc1D strains.
	Parent Strain	Codon Pair	AA	Inhib. or Opt.	Count	Median		GFP/RFP	AVE	SD	I/O	SD		Parent Strain	Codon Pair	AA	Inhib. or Opt.	Count	Median		GFP/RFP	AVE	SD	I/O	SD
						GFP	RFP												GFP	RFP
	WT	AGA-AGA	RR	optimal	9831	16117	27872	0.578251	0.569952	0.00780022				asc1-Δ	AGA-AGA	RR	optimal	9895	11586	29167	0.39723	0.426792	0.0200606
	WT	AGA-AGA	RR	optimal	9873	15348	26700	0.574831						asc1-Δ	AGA-AGA	RR	optimal	9941	12757	29027	0.439487
	WT	AGA-AGA	RR	optimal	9898	15856	28207	0.56213						asc1-Δ	AGA-AGA	RR	optimal	9912	13357	30965	0.431358
	WT	AGA-AGA	RR	optimal	9836	16117	28546	0.564597						asc1-Δ	AGA-AGA	RR	optimal	9874	13860	31565	0.439094
	WT	AGG-CGA	RR	inhibitory	9876	7365	28546	0.258005	0.262398	0.00661634	0.460386	0.0132083		asc1-Δ	AGG-CGA	RR	inhibitory	9775	7546	32099	0.235085	0.220882	0.0240702	0.517539	0.0614204
	WT	AGG-CGA	RR	inhibitory	9687	7546	27739	0.272036						asc1-Δ	AGG-CGA	RR	inhibitory	9877	6404	28546	0.22434
	WT	AGG-CGA	RR	inhibitory	9680	7529	29167	0.258134						asc1-Δ	AGG-CGA	RR	inhibitory	9779	5474	29447	0.185893
	WT	AGG-CGA	RR	inhibitory	9656	7269	27806	0.261418						asc1-Δ	AGG-CGA	RR	inhibitory	9677	8581	36023	0.238209
	WT	CGA-CGA	RR	inhibitory	9646	5580	30597	0.182371	0.17394	0.00937376	0.305183	0.0169686		asc1-Δ	CGA-CGA	RR	inhibitory	9704	13989	36459	0.383691	0.369706	0.0101922	0.866244	0.047203
	WT	CGA-CGA	RR	inhibitory	9603	5114	28342	0.180439						asc1-Δ	CGA-CGA	RR	inhibitory	9893	9884	27410	0.360598
	WT	CGA-CGA	RR	inhibitory	9692	4682	28889	0.162069						asc1-Δ	CGA-CGA	RR	inhibitory	9831	12467	34249	0.364011
	WT	CGA-CGA	RR	inhibitory	9716	4913	28751	0.170881						asc1-Δ	CGA-CGA	RR	inhibitory	9888	11095	29944	0.370525
	WT	CGA-CGG	RR	inhibitory	9910	3671	26573	0.138148	0.135588	0.00333218	0.237894	0.00669184		asc1-Δ	CGA-CGG	RR	inhibitory	9907	9197	29730	0.309351	0.310108	0.00725492	0.726601	0.0381491
	WT	CGA-CGG	RR	inhibitory	9556	3878	29588	0.131067						asc1-Δ	CGA-CGG	RR	inhibitory	9936	7512	24978	0.300745
	WT	CGA-CGG	RR	inhibitory	9747	4193	31039	0.135088						asc1-Δ	CGA-CGG	RR	inhibitory	9639	10412	32721	0.318205
	WT	CGA-CGG	RR	inhibitory	9717	3894	28207	0.138051						asc1-Δ	CGA-CGG	RR	inhibitory	9913	9642	30891	0.31213
	WT	AGA-AUU	RI	optimal	9543	19211	36197	0.530735	0.521626	0.0258373				asc1-Δ	AGA-AUU	RI	optimal	9877	19807	33840	0.585313	0.582785	0.00374155
	WT	AGA-AUU	RI	optimal	9786	18158	35082	0.517587						asc1-Δ	AGA-AUU	RI	optimal	9875	19576	33840	0.578487
	WT	AGA-AUU	RI	optimal	9775	17862	32486	0.549837						asc1-Δ	AGA-AUU	RI	optimal	9874	17946	35167	Q out
	WT	AGA-AUU	RI	optimal	9788	16887	34580	0.488346						asc1-Δ	AGA-AUU	RI	optimal	9862	21210	36284	0.584555
	WT	CGA-AUA	RI	inhibitory	9644	7430	30088	0.246942	0.247151	0.00338451	0.473808	0.0243492		asc1-Δ	CGA-AUA	RI	inhibitory	9857	7496	33276	0.225267	0.227608	0.00871061	0.390552	0.0151554
	WT	CGA-AUA	RI	inhibitory	9683	7158	29517	0.242504						asc1-Δ	CGA-AUA	RI	inhibitory	9837	7939	33116	0.239733
	WT	CGA-AUA	RI	inhibitory	9659	7173	28820	0.24889						asc1-Δ	CGA-AUA	RI	inhibitory	9909	7852	35850	0.219024
	WT	CGA-AUA	RI	inhibitory	9670	7512	30016	0.250267						asc1-Δ	CGA-AUA	RI	inhibitory	9926	7680	33921	0.226408
	WT	AGA-CCA	RP	optimal	9894	18720	25519	0.733571	0.72915	0.00328803				asc1-Δ	AGA-CCA	RP	optimal	9952	16382	28958	0.565716	0.565404	0.00423406
	WT	AGA-CCA	RP	optimal	9874	20280	27939	0.725867						asc1-Δ	AGA-CCA	RP	optimal	9894	17367	30597	0.567605
	WT	AGA-CCA	RP	optimal	9924	19995	27476	0.727726						asc1-Δ	AGA-CCA	RP	optimal	9936	17449	30670	0.568927
	WT	AGA-CCA	RP	optimal	9891	20042	27476	0.729437						asc1-Δ	AGA-CCA	RP	optimal	9915	17572	31414	0.559368
	WT	CGA-CCG	RP	inhibitory	9667	4976	29306	0.169795	0.17014	0.00757022	0.23334	0.0104354		asc1-Δ	CGA-CCG	RP	inhibitory	9792	13638	33921	0.402052	0.396148	0.00821259	0.700646	0.0154438
	WT	CGA-CCG	RP	inhibitory	9699	5039	29517	0.170715						asc1-Δ	CGA-CCG	RP	inhibitory	9680	13860	34580	0.40081
	WT	CGA-CCG	RP	inhibitory	9579	4997	27872	0.179284						asc1-Δ	CGA-CCG	RP	inhibitory	9891	12640	31793	0.397572
	WT	CGA-CCG	RP	inhibitory	9639	4791	29801	0.160766						asc1-Δ	CGA-CCG	RP	inhibitory	9916	12184	31716	0.384159
	WT	AGA-UUG	RL	optimal	9879	20961	30965	0.676926	0.676749	0.00541476				asc1-Δ	AGA-UUG	RL	optimal	9925	18073	33436	0.540525	0.534479	0.0267556
	WT	AGA-UUG	RL	optimal	9894	20424	29944	0.682073						asc1-Δ	AGA-UUG	RL	optimal	9939	17205	30965	0.555627
	WT	AGA-UUG	RL	optimal	9859	19438	28958	0.671248						asc1-Δ	AGA-UUG	RL	optimal	9808	32958	66522	0.495445
	WT	AGA-UUG	RL	optimal	9844	21010	29097	Q out						asc1-Δ	AGA-UUG	RL	optimal	9789	19120	34998	0.546317
	WT	CGA-CUG	RL	inhibitory	9661	8524	29873	0.285341	0.290547	0.00399575	0.429327	0.00683089		asc1-Δ	CGA-CUG	RL	inhibitory	9909	7646	36372	0.210217	0.210858	0.0022162	0.394512	0.0201796
	WT	CGA-CUG	RL	inhibitory	9832	7765	26764	0.290129						asc1-Δ	CGA-CUG	RL	inhibitory	9871	8893	42547	0.209016
	WT	CGA-CUG	RL	inhibitory	9756	8581	29097	0.29491						asc1-Δ	CGA-CUG	RL	inhibitory	9887	7158	33436	0.214081
	WT	CGA-CUG	RL	inhibitory	9702	8430	28889	0.291807						asc1-Δ	CGA-CUG	RL	inhibitory	9913	6777	32253	0.21012
	WT	AGA-GCU	RA	optimal	9899	20569	27476	0.748617	0.739491	0.00799235				asc1-Δ	AGA-GCU	RA	optimal	9874	17367	31114	0.558173	0.554264	0.00984682
	WT	AGA-GCU	RA	optimal	9895	20961	28546	0.734289						asc1-Δ	AGA-GCU	RA	optimal	9929	17125	31189	0.549072
	WT	AGA-GCU	RA	optimal	9909	19854	26700	0.743596						asc1-Δ	AGA-GCU	RA	optimal	9894	17205	31640	0.543774
	WT	AGA-GCU	RA	optimal	9912	19484	26637	0.731464						asc1-Δ	AGA-GCU	RA	optimal	9891	17696	31263	0.566037
	WT	CGA-GCG	RA	inhibitory	9764	7414	28005	0.264738	0.264092	0.00110068	0.357126	0.00413683		asc1-Δ	CGA-GCG	RA	inhibitory	9877	7869	31716	0.248108	0.246505	0.00246769	0.444744	0.00906917
	WT	CGA-GCG	RA	inhibitory	9760	7479	28478	0.262624						asc1-Δ	CGA-GCG	RA	inhibitory	9891	8135	32800	0.248018
	WT	CGA-GCG	RA	inhibitory	9820	7284	27476	0.265104						asc1-Δ	CGA-GCG	RA	inhibitory	9750	8834	36372	0.242879
	WT	CGA-GCG	RA	inhibitory	9771	6545	24801	0.263901						asc1-Δ	CGA-GCG	RA	inhibitory	9917	8299	33597	0.247016
	WT	UUG-CCA	LP	optimal	9895	23371	27739	0.842532	0.830176	0.024259				asc1-Δ	UUG-CCA	LP	optimal	9916	20327	31338	0.648637	0.645833	0.0114824
	WT	UUG-CCA	LP	optimal	9910	23876	28005	0.852562						asc1-Δ	UUG-CCA	LP	optimal	9681	22027	34914	0.630893
	WT	UUG-CCA	LP	optimal	9939	19622	24624	0.796865						asc1-Δ	UUG-CCA	LP	optimal	9905	19256	29236	0.65864
	WT	UUG-CCA	LP	optimal	9910	22662	27345	0.828744						asc1-Δ	UUG-CCA	LP	optimal	9886	21060	32643	0.645161
	WT	CUC-CCG	LP	inhibitory	9800	4176	25458	0.164035	0.163115	0.00137314	0.196482	0.00597501		asc1-Δ	CUC-CCG	LP	inhibitory	9894	5509	31189	0.176633	0.171826	0.00460319	0.266054	0.00855434
	WT	CUC-CCG	LP	inhibitory	9782	4852	29517	0.16438						asc1-Δ	CUC-CCG	LP	inhibitory	9867	10318	62284	0.165661
	WT	CUC-CCG	LP	inhibitory	9777	4965	30523	0.162664						asc1-Δ	CUC-CCG	LP	inhibitory	9917	5616	32721	0.171633
	WT	CUC-CCG	LP	inhibitory	9813	4371	27085	0.161381						asc1-Δ	CUC-CCG	LP	inhibitory	9913	5592	32253	0.173379
	WT	CUG-CCG	LP	inhibitory	9821	4711	29167	Q out	0.226786	0.00597616	0.273179	0.0107491		asc1-Δ	CUG-CCG	LP	inhibitory	9888	6080	33921	0.17924	0.164134	0.0190219	0.254142	0.0297978
	WT	CUG-CCG	LP	inhibitory	9781	6942	31565	0.219927						asc1-Δ	CUG-CCG	LP	inhibitory	9890	5787	33436	0.173077
	WT	CUG-CCG	LP	inhibitory	9815	6616	28820	0.229563						asc1-Δ	CUG-CCG	LP	inhibitory	9928	5568	33196	0.167731
	WT	CUG-CCG	LP	inhibitory	9796	6559	28410	0.230869						asc1-Δ	CUG-CCG	LP	inhibitory	9751	7731	56643	0.136486
	WT	UUG-AGA	LR	optimal	9940	20961	29588	0.708429	0.712819	0.00736658				asc1-Δ	UUG-AGA	LR	optimal	9866	16306	29097	0.560401	0.559869	0.00282682
	WT	UUG-AGA	LR	optimal	9868	22716	32022	0.709387						asc1-Δ	UUG-AGA	LR	optimal	9905	17085	30743	0.555736
	WT	UUG-AGA	LR	optimal	9927	20961	28958	0.723841						asc1-Δ	UUG-AGA	LR	optimal	9916	17737	31565	0.56192
	WT	UUG-AGA	LR	optimal	9912	22079	31114	0.709616						asc1-Δ	UUG-AGA	LR	optimal	9912	16691	29730	0.561419
	WT	CUG-CGA	LR	inhibitory	9861	6226	29236	0.212957	0.209513	0.00298582	0.293921	0.00517417		asc1-Δ	CUG-CGA	LR	inhibitory	9921	5439	33436	0.162669	0.162994	0.00418391	0.291128	0.00761621
	WT	CUG-CGA	LR	inhibitory	9816	5774	27806	0.207653						asc1-Δ	CUG-CGA	LR	inhibitory	9793	6146	36372	0.168976
	WT	CUG-CGA	LR	inhibitory	9786	17085	29944	Q out						asc1-Δ	CUG-CGA	LR	inhibitory	9895	5652	35167	0.160719
	WT	CUG-CGA	LR	inhibitory	9815	5964	28683	0.207928						asc1-Δ	CUG-CGA	LR	inhibitory	9900	5640	35336	0.159611
	WT	GUU-AGA	VR	optimal	9941	16808	22770	0.738164	0.72956	0.00709268				asc1-Δ	GUU-AGA	VR	optimal	9889	17449	30891	0.564857	0.556031	0.0113322
	WT	GUU-AGA	VR	optimal	9916	20184	27607	0.731119						asc1-Δ	GUU-AGA	VR	optimal	9830	18286	32331	0.565587
	WT	GUU-AGA	VR	optimal	9920	19438	26956	0.721101						asc1-Δ	GUU-AGA	VR	optimal	9879	17820	32879	0.541987
	WT	GUU-AGA	VR	optimal	9933	19714	27085	0.727857						asc1-Δ	GUU-AGA	VR	optimal	9845	18986	34414	0.551694
	WT	GUA-CGA	VR	inhibitory	9860	4032	27085	0.148865	0.153496	0.00425921	0.210395	0.00618601		asc1-Δ	GUA-CGA	VR	inhibitory	9863	4556	36635	0.124362	0.123002	0.00149132	0.221213	0.00524591
	WT	GUA-CGA	VR	inhibitory	9792	4652	29236	0.159119						asc1-Δ	GUA-CGA	VR	inhibitory	9822	7049	56781	0.124144
	WT	GUA-CGA	VR	inhibitory	9837	4380	28751	0.152343						asc1-Δ	GUA-CGA	VR	inhibitory	9846	4509	37169	0.121311
	WT	GUA-CGA	VR	inhibitory	9854	4142	26956	0.153658						asc1-Δ	GUA-CGA	VR	inhibitory	9955	4066	33276	0.12219
	WT	GUG-CGA	VR	inhibitory	9860	8373	28751	0.291225	0.294381	0.00323643	0.403504	0.0059218		asc1-Δ	GUG-CGA	VR	inhibitory	9861	7612	33196	0.229305	0.228345	0.00437786	0.410669	0.0114909
	WT	GUG-CGA	VR	inhibitory	9876	7765	26447	0.293606						asc1-Δ	GUG-CGA	VR	inhibitory	36	2761	7904	Q out
	WT	GUG-CGA	VR	inhibitory	9821	8208	27939	0.293783						asc1-Δ	GUG-CGA	VR	inhibitory	9891	7333	32800	0.223567
	WT	GUG-CGA	VR	inhibitory	9835	8411	28139	0.298909						asc1-Δ	GUG-CGA	VR	inhibitory	9917	7800	33597	0.232164

## Sheet: 4C
	Source data for 4C
	GFP/RFP x 100 values of Rluc-GFP reporters with no-go inserts (in frame, +1 and -1 frame) in wt, asc1D, mbf1D and asc1D mbf1D strains.
	Strain	Frame	Count	GFP Median	RFP Median	GFP/RFP	Average	noBG*	Std
	wt	0	9989	5556	23151	23.999	24.9428	24.4228	0.791287
			9938	7158	28751	24.8965
			9946	7205	28889	24.9403
			9767	7333	28274	25.9355
		+1	8925	149	26764	0.556718	0.632874	0.112874	0.064588
			9957	215	30088	0.714571
			9971	178	28410	0.62654
			9986	170	26828	0.633666
		-1	9988	157	28683	0.547363	0.62207	0.10207	0.0895305
			9970	171	29306	0.583498
			9983	173	28546	0.606039
			9826	215	28614	0.75138
	asc1D	0	9973	11299	27085	41.7168	41.6687	41.1487	0.39513
			9969	12212	28958	42.1714
			9980	11325	27476	41.2178
			9973	11586	27872	41.5686
		+1	9989	232	27673	0.838362	0.880856	0.360856	0.0362938
			9962	250	27085	0.92302
			9986	250	28820	0.867453
			9980	240	26828	0.894588
		-1	9965	265	30160	0.878647	0.847643	0.327643	0.0254324
			9980	254	30232	0.840169
			9990	242	28342	0.853856
			9975	242	29588	0.817899
	mbf1D	0	9958	6602	25948	25.4432	25.286	24.766	0.265677
			9987	6573	26321	24.9725
			9967	6792	26573	25.5598
			9960	6866	27280	25.1686
		+1	9955	222	26321	0.843433	0.814874	0.294874	0.0275885
			9988	212	27280	0.777126
			9966	220	26828	0.820039
			9988	225	27476	0.818896
		-1	9904	212	29097	0.728597	0.742436	0.222436	0.0563354
			9920	205	27673	0.740794
			9963	192	28139	0.682327
			9957	228	27872	0.818025
	asc1D mbf1D	0	9975	9470	24334	38.9167	39.2307	38.7107	0.682945
			9965	9343	24104	38.7612
			9973	9115	27085	33.6533	OUTLIER
			9924	9599	23989	40.0142
		+1	9938	417	22502	1.85317	1.78418	1.26418	0.0762071
			9979	414	24334	1.70132
			9889	410	23594	1.73773
			9966	419	22716	1.84451
		-1	9927	391	25157	1.55424	1.52021	1.00021	0.0614902
			9974	374	23989	1.55905
			9986	369	25824	1.4289
			9969	388	25217	1.53864
	* RFP only Background = 0.52
	noBG*	background subtracted

## Sheet: 4D
	Source data for 4D
	GFP/RFP x 100 values of GLN4-GFP reporters with CGA-CGG IOO construct (+1 frame) derived variants (difference shown in red) in wt, asc1D, mbf1D and asc1D mbf1D strains.
	Strain	Insert	Count	Median GFP	Median RFP	GFP/RFP*100	Average	noBG*	std		Data for original IOO is reported in Figure 4-figure supplement 2B
	wt	OOO	6876	117	36812	0.317831	0.376947	0	0.0517974
			6842	108	30743	0.351299
			6592	121	29730	0.406996
			6535	125	28958	0.43166
		IOO TTAAACCGACGGCAC	7486	129	35336	0.365067	0.424205	0	0.0581235
			7207	122	31716	0.384664
			7395	152	32800	0.463415
			7203	156	32253	0.483676
		IOO TTATTACGACGGCAC	7307	136	34580	0.393291	0.415854	0	0.0366421
			7172	139	33759	0.411742
			5116	199	42444	0.468853
			7262	136	34914	0.389529
		IOO TTATTGCGACGGCAC	6754	156	34249	0.455488	0.44322	0	0.0257371
			7468	138	33921	0.406828
			6884	155	33276	0.465801
			6883	148	33276	0.444765
		IOO TTACGACGGTCTCAC	7255	111	33276	0.333574	0.320106	0	0.0118859
			6546	114	34914	0.326517
			7054	100	32099	0.311536
			7316	105	34003	0.308796
		IOO TTACGACGGGAC	7074	100	30965	0.322945	0.319875	0	0.00952781
			7426	107	33921	0.315439
			7062	100	30160	0.331565
			7323	104	33597	0.309551
	asc1D	OOO	5138	146	26072	0.559988	0.558577	0.0985768	0.0362483
			5039	144	26321	0.547092
			4925	156	25702	0.606957
			5227	135	25948	0.520271
		IOO TTAAACCGACGGCAC	78	1322	21110	6.26243	5.81219	5.35219	0.308001
			5112	1481	26447	5.59988
			5144	1492	26510	5.62806
			5312	1459	25337	5.75838
		IOO TTATTACGACGGCAC	5047	2665	26447	10.0768	9.57696	9.11696	0.411671
			5448	2599	26700	9.73408
			5304	2549	27280	9.34384
			5309	2539	27739	9.15318
		IOO TTATTGCGACGGCAC	4947	2849	26259	10.8496	10.2843	9.82433	0.56879
			5196	2524	26573	9.49836
			5017	2712	26259	10.3279
			5240	2734	26134	10.4615
		IOO TTACGACGGTCTCAC	5192	192	25886	0.741714	0.789443	0.329443	0.15008
			4945	224	24450	0.916155
			4812	234	25948	0.901804
			5665	183	30597	0.598098
		IOO TTACGACGGGAC	5300	147	27280	0.538856	0.603396	0.143396	0.0955262
			5281	140	27673	0.505908
			5287	174	26072	0.667383
			4893	179	25519	0.701438
	mbf1D	OOO	6632	111	29873	0.371573	0.445305	0	0.135732
			7346	114	34249	0.332856
			6561	122	27806	0.438754
			5216	156	24450	0.638037
		IOO TTAAACCGACGGCAC	5124	3077	24742	12.4363	12.2412	11.7812	0.556425
			5024	2905	22932	12.6679
			5637	2860	25038	11.4226
			4739	2998	24104	12.4378
		IOO TTATTACGACGGCAC	4856	7237	23316	31.0388	30.5885	30.1285	1.11167
			5307	7904	24742	31.9457
			4811	7126	24104	29.5636
			4901	7253	24334	29.806
		IOO TTATTGCGACGGCAC	5293	160	24742	0.646674	0.610099	0.150099	0.0395655
			5308	157	25277	0.621118
			5549	140	25277	0.553863
			5300	152	24566	0.618741
		IOO TTACGACGGTCTCAC	5326	306	22502	1.35988	1.22322	0.763223	0.0976793
			5034	281	23650	1.18816
			4956	290	23876	1.21461
			4987	277	24508	1.13024
		IOO TTACGACGGGAC	5188	8226	25097	32.7768	32.0342	31.5742	1.04134
			5214	8099	24566	32.9683
			4856	7612	24046	31.656
			4431	7269	23650	30.7357
	asc1D mbf1D	OOO	6090	175	21923	0.798248	0.861942	0.401942	0.0429517
			6023	185	20764	0.890965
			6018	183	20911	0.875137
			6050	183	20715	0.883418
		IOO TTAAACCGACGGCAC	6626	6226	19901	31.2849	30.8607	30.4007	0.348785
			6110	6107	19854	30.7595
			6137	7080	22878	30.9468
			6237	6474	21260	30.4516
		IOO TTATTACGACGGCAC	5937	7301	20715	35.245	36.4373	35.9773	1.06844
			6323	7612	21060	36.1443
			6324	7714	21110	36.5419
			6381	7834	20715	37.818
		IOO TTATTGCGACGGCAC	6527	8562	22184	38.5954	37.261	36.801	1.29874
			6309	7817	20764	37.6469
			6518	8045	21563	37.3093
			5872	7080	19948	35.4923
		IOO TTACGACGGTCTCAC	5777	355	22824	1.55538	1.52779	1.06779	0.0548787
			6219	341	23371	1.45907
			6234	345	22824	1.51157
			6257	337	21260	1.58514
		IOO TTACGACGGGAC	6206	179	22555	0.793616	0.859726	0.399726	0.0558055
			6173	181	21717	0.833448
			6060	186	20472	0.908558
			6375	188	20813	0.903282
	* RFP only Background = 0.46
	noBG*	background subtracted

## Sheet: 4E
	Source data for 4E
	GFP/RFP x 100 values of GLN4-GFP reporters with yeast native gene AYT1 sequences containing CGA-CGG codon pair (in frame or +1 frame) in wt, asc1D, mbf1D and asc1D mbf1D strains
	Strain	Frame	Count	Median GFP	Median RFP	GFP/RFP*100	noBG*	average	std
	wt	0	5302	5556	22079	25.1642	24.6442	23.9465	0.604783
			5324	5616	23261	24.1434	23.6234
			5312	5604	23261	24.0918	23.5718
			5232	3462	21768	15.9041	15.3841	OUTLIER
		+1	5584	104	23650	0.439746	0	0	0
			4897	127	26072	0.487113	0
			5053	117	24104	0.485397	0
			5257	113	25097	0.450253	0
	asc1D	0	3560	6120	21462	28.5155	27.9955	29.1551	1.01628
			1630	5509	37984	14.5035	13.9835	OUTLIER
			3663	6294	20911	30.099	29.579
			3663	6573	21614	30.4108	29.8908
		+1	3517	2266	23819	9.51341	8.99341	9.58347	0.749169
			4070	2249	22027	10.2102	9.6902
			3859	2189	22878	9.56814	9.04814
			3997	2359	21210	11.1221	10.6021
	mbf1D	0	3691	4604	24860	18.5197	17.9997	18.1719	1.29548
			3221	4731	24218	19.5351	19.0151
			3386	4701	23763	19.7829	19.2629
			4146	4435	26196	16.9301	16.4101
		+1	4125	2911	25580	11.38	10.86	11.0825	0.808327
			3795	3040	24566	12.3748	11.8548
			3698	2928	24218	12.0902	11.5702
			4647	2614	24742	10.565	10.045
	asc1D mbf1D	0	4501	2457	18073	13.5949	13.0749	12.336	0.941137
			4115	2359	20232	11.6597	11.1397
			4181	2509	19995	12.5481	12.0281
			4180	2568	18853	13.6212	13.1012
		+1	3872	3823	21666	17.6452	17.1252	16.2537	0.71957
			4355	3649	21360	17.0833	16.5633
			4327	3462	21411	16.1693	15.6493
			4733	3379	20862	16.1969	15.6769
	* RFP only Background = 0.52
	noBG*	background subtracted
