# Supplementary material for: Multi-protein bridging factor 1(Mbf1), Rps3 and Asc1 prevent stalled ribosomes from frameshifting
Source: eLife. 2018 Nov 22;7:e39637. doi: 10.7554/eLife.39637 (PMC6301793; doi:10.7554/eLife.39637)
Supplement: Figure 5—source data 1. [file elife-39637-fig5-data1.xlsx]

## Sheet: 5D
	Source data for 5D
	Plasmid	Count	Median GFP	Median RFP	GFP/RFP	Average	noBG*	Std	P values**
	ev	5143	1119	11197	9.99375	10.3476	9.93765	0.264841
		5343	1453	13669	10.6299
		5410	1418	13606	10.4219
		5269	1481	14316	10.3451
	tR(ICG)	5273	1193	12845	9.28766	9.18329	8.77329	0.538447	0.00816293
		5357	946	11120	8.50719
		5324	1230	13481	9.12395
		5175	1290	13144	9.81436
	tD(GUC)	4998	1132	11560	9.79239	10.2586	9.84863	0.742707	0.828875
		4997	1177	12438	9.46294
		5059	1473	13606	10.8261
		4837	1579	14416	10.9531
	tR(CCG)	6090	109	12467	0.874308	0.893392	0.483392	0.0509535	5.66552e-10
		5596	97.7	10202	0.957655
		5811	99	10945	0.904523
		5872	91.2	10895	0.837081
	tG(GCC)	5053	1924	13989	13.7537	15.3407	14.9307	2.2943	0.00496169
		5318	2452	14151	17.3274
		5028	1512	11639	12.9908
		5023	2257	13053	17.291
	tH(GUG)	5062	1386	14550	9.52577	9.30211	8.89211	0.585454	0.0173742
		5246	964	11377	8.47324
		5236	1317	13388	9.83717
		5406	1290	13764	9.37228
	tS(AGA)	5127	1348	13669	9.86173	9.64732	9.23732	0.53256	0.0566767
		5560	1353	13732	9.8529
		5398	976	11020	8.85662
		5432	1278	12757	10.018
	* RFP only Background = 0.41
	noBG*	Background subtracted
	** P values: comparison with empty vector (ev), two tailed t test
