# Supplementary material for: Multi-protein bridging factor 1(Mbf1), Rps3 and Asc1 prevent stalled ribosomes from frameshifting
Source: eLife. 2018 Nov 22;7:e39637. doi: 10.7554/eLife.39637 (PMC6301793; doi:10.7554/eLife.39637)
Supplement: Supplementary file 1 — Effects of RPS3-K108E, mbf1Δ and RPS3-K108E mbf1Δ mutants on GFP/RFP protein, mRNA and protein/mRNA from in-frame and frameshifted RLuc-Arg4-GFP/RFP. [file elife-39637-supp1.xlsx]

## Sheet: SuppFile1
		Supplement File 1
		GFP/RFP fluorescence (x100), mRNA and protein/mRNA values of Rluc-GFP reporters with Arg4 codon inserts (in frame and +1 frame) in wt, RPS3-K108E, mbf1D and RPS3-K108E mbf1D strains (Fig. 2B, Fig.2-figure supplement 1B).
		Codon Insert	GFP/RFP		wt 1				RPS3-K108E 2				mbf1D 3				RPS3-K108E mbf1D 4
		(AGA)4	Protein (x100)		27.4666	±	0.203378		30.5708	±	0.570509		27.4593	±	0.204908		32.3968	±	1.04302
			mRNA		0.0579821	±	0.0061088		0.0713325	±	0.00655078		0.067251	±	0.00372075		0.0693554	±	0.00319318
			Protein/mRNA		473.707	±	50.0313		428.567	±	40.1616		408.311	±	22.7949		467.113	±	26.2428
		(CGA)4	Protein (x100)		6.94324	±	0.123702		5.33822	±	0.0772682		5.62143	±	0.0429199		5.50518	±	0.0339373
			mRNA		0.0556956	±	0.00208937		0.0536052	±	0.00374697		0.0526363	±	0.00566566		0.0542761	±	0.00395999
			Protein/mRNA		124.664	±	5.17727		99.584	±	7.10855		106.797	±	11.5243		101.429	±	7.42666
		(AGA)4+1	Protein (x100)		0	±	0.00526262		0	±	0.00953571		0	±	0.00585542		0	±	0.0119839
			mRNA				NA				NA				NA				NA
			Protein/mRNA				NA				NA				NA				NA
		(CGA)4+1	Protein (x100)		0.00756836	±	0.0163761		3.55777	±	0.0936853		4.38403	±	0.0425088		5.90768	±	0.200093
			mRNA		0.041107	±	0.00338371		0.046617	±	0.0022232		0.0443316	±	0.0052363		0.0549612	±	0.000524948
			Protein/mRNA		0.184114	±	0.398665		76.3192	±	4.15769		98.8919	±	11.7201		107.488	±	3.78261
		Strains tested (FOA-treated): 1 YJYW1093, 2 YJYW1097, 3 YJYW1291, 4 YJYW1307.
		NA: Not Available
