# Supplementary material for: Multi-protein bridging factor 1(Mbf1), Rps3 and Asc1 prevent stalled ribosomes from frameshifting
Source: eLife. 2018 Nov 22;7:e39637. doi: 10.7554/eLife.39637 (PMC6301793; doi:10.7554/eLife.39637)
Supplement: Supplementary file 2 — Effects of asc1Δ, mbf1Δ and asc1Δ mbf1Δ mutations on GFP/RFP protein, mRNA and protein/mRNA from GLN4(1-99)-GFP reporters with three CGA-CGA codon pairs in the 0, +1, and −1 reading frames. [file elife-39637-supp2.xlsx]

## Sheet: SuppFile2
		Supplement File 2
		GFP/RFP fluorescence (x100), mRNA and protein/mRNA values of GLN4 (1-99)-GFP reporters with (Arg-Arg)3 codon inserts (0, +1, and -1 frame) in wt, asc1D, mbf1D and asc1D mbf1D strains (Fig. 3A, Fig.3-figure supplement 1A and D).
		Codon Insert	GFP/RFP		wt 1				asc1D 2				mbf1D 3				asc1D mbf1D 4
		(AGA-AGA)3	Protein (x100)		72.3352	±	1.14103		57.3708	±	0.838797		73.5337	±	0.370142		59.8472	±	0.928734
			mRNA			±	NA			±	NA			±	NA			±	NA
			Protein/mRNA			±	NA			±	NA			±	NA			±	NA
		(CGA-CGA)3	Protein (x100)		21.3515	±	0.342182		47.5929	±	0.876867		16.5818	±	0.364423		28.6515	±	0.803145
			mRNA		0.100634	±	0.0125835		0.200179	±	0.0140198		0.0836291	±	0.0082562		0.152801	±	0.0331053
			Protein/mRNA		212.171	±	26.7475		237.752	±	17.2178		198.278	±	20.054		187.509	±	40.9638
		(AGA-AGA)3+1	Protein (x100)		0.0725099	±	0.0159503		0.234772	±	0.04501		0	±	0.0413692		0.227428	±	0.0107821
			mRNA			±	NA			±	NA			±	NA			±	NA
			Protein/mRNA			±	NA			±	NA			±	NA			±	NA
		(CGA-CGA)3+1	Protein (x100)		0.107536	±	0.0291926		5.93987	±	0.0949744		6.9696	±	0.167705		15.4092	±	0.18663
			mRNA		0.0613194	±	0.00440824		0.163509	±	0.00838386		0.084061	±	0.0234113		0.151771	±	0.0129902
			Protein/mRNA		1.75371	±	0.492485		36.3275	±	1.95115		82.9113	±	23.1771		101.53	±	8.77658
		(AGA-AGA)3-1	Protein (x100)		0.0684507	±	0.0281824		0.271677	±	0.0729776		0.0391698	±	0.0290852		0.302789	±	0.0128077
			mRNA			±	NA			±	NA			±	NA			±	NA
			Protein/mRNA			±	NA			±	NA			±	NA			±	NA
		(CGA-CGA)3-1	Protein (x100)		0.0909475	±	0.0559992		0.390971	±	0.0256965		0.334338	±	0.0419268		1.75424	±	0.0207881
			mRNA		0.0424552	±	0.00851731		0.0698762	±	0.0153559		0.0480881	±	0.00362243		0.0812702	±	0.0162324
			Protein/mRNA		2.1422	±	1.38727		5.59521	±	1.28341		6.95262	±	1.01709		21.5853	±	4.31889
		Strains tested (FOA-treated): 1 AW765, 2 AW768, 3 YJYW377, 4 YJYW378.
		NA: Not Available
