# Supplementary material for: Multi-protein bridging factor 1(Mbf1), Rps3 and Asc1 prevent stalled ribosomes from frameshifting
Source: eLife. 2018 Nov 22;7:e39637. doi: 10.7554/eLife.39637 (PMC6301793; doi:10.7554/eLife.39637)
Supplement: Supplementary file 3 [file elife-39637-supp3.xlsx]

## Sheet: SuppTable 1
		Supplementary Table 1
		Yeast strains employed in this work.
		Yeast strain	Genotype	Source
		BY4741	MATa his3D1 leu2D0 met15D0 ura3D0	Open Biosystems
		BY4742	MATa his3D1 leu2D0 lys2D0 ura3D0	Open Biosystems
		YJYW216	BY4741, can1::GLN4(1-99)-(CGA)6+1-URA3, ade2::GLN4(1-99)-(CGA)4+1-GFP::MET15	this study
		YJYW322	BY4742, can1::GLN4(1-99)-(CGA)6+1-URA3, ade2::GLN4(1-99)-(CGA)4+1-GFP::HIS5(S.pombe)	this study
		YJYW289	YJYW216, [2µ, LEU2, ASC1]	this study
		YJYW329	YJYW322, [2µ, LEU2, ASC1]	this study
		YJYW290-P15	YJYW289, mbf1-R89K	this study
		YJYW290-P25	YJYW289, mbf1D125-151	this study
		YJYW290-P38	YJYW289, mbf1-K64E	this study
		YJYW290-P96	YJYW289, mbf1-S86P	this study
		YJYW331-Q16	YJYW329, mbf1-R89G	this study
		YJYW331-Q28	YJYW329, mbf1-R61T	this study
		YJYW331-Q43	YJYW329, mbf1-I85T	this study
		YJYW331-Q91	YJYW329, mbf1-S86P	this study
		YJYW290-P3	YJYW289, RPS3-duplication of a.a. 22-29	this study
		YJYW290-P8	YJYW289, RPS3-L113F	this study
		YJYW331-Q7	YJYW329, RPS3-S104Y	this study
		YJYW331-Q82	YJYW329, RPS3-G121D	this study
		YJYW315	YJYW290-P25, screened for Leu-	this study
		YJYW238	YJYW216, asc1D::bleR	this study
		YJYW376	YJYW216, mbf1D::kanR	this study
		YJYW2859-2862	YJYW322, mbf1D::kanR	this study
		YJYW2566	BY4741, HIS3+	this study
		AW106	BY4741, gcn4D::bleR	this study
		YJYW2843-2844	AW106, HIS3+	this study
		YJYW2683-2685	YJYW2566, mbf1D::kanR	this study
		YJYW2691-2693	YJYW2566, mbf1-K64E::kanR	this study
		YJYW2695-2697	YJYW2566, mbf1-I85T::kanR	this study
		YJYW865	BY4741, rps3D::bleR, [2µ, URA3, RPS3]	this study
		YJYW1093	YJYW865, [CEN, LEU2, RPS3]	this study
		YJYW1097	YJYW865, [CEN, LEU2, RPS3-K108E]	this study
		YJYW1291	YJYW1093, mbf1D::kanR	this study
		YJYW1307	YJYW1097, mbf1D::kanR	this study
		YJYW2578	YJYW331-Q7, screened for Leu-	this study
		YJYW2582	YJYW331-Q82, screened for Leu-	this study
		YJYW2594-2597	YJYW2578, mbf1D::kanR	this study
		YJYW2863-2866	YJYW2582, mbf1D::kanR	this study
		AW765	BY4741, [2µ, URA3, ASC1]	(Wolf and Grayhack, 2015)
		AW768	BY4741, asc1D::HIS5(S.pombe), [2µ, URA3, ASC1]	(Wolf and Grayhack, 2015)
		YJYW377	AW765, mbf1D::kanR	this study
		YJYW378	AW768, mbf1D::kanR	this study
		YJYW2147-2150	AW765, MBF1-HA::kanR	this study
		YJYW2151-2154	AW768, MBF1-HA::kanR	this study

## Sheet: SuppTable 2
	Supplementary Table 2
	Plasmids employed in this work.
	Plasmid Name	Parent	Description	Source
	pAVA0577		2µ, LEU2 vector	(Alexandrov et al., 2006)
	pAVA0581		CEN, LEU2 vector	(Alexandrov et al., 2006)
	pEAW141	pAVA0577	ASC1 No Intron	(Wolf and Grayhack, 2015)
	pDL870	pAVA0577	tR(ACG)D-A34U	(Letzring et al., 2010)
	pEJYW176	pAVA0581	MBF1	this study
	pEJYW203	pAVA0577	MBF1	this study
	pECB194	pAVA0577	2µ, URA3 vector with LIC site	(Alexandrov et al., 2006)
	pEAW433	pECB194	RPS3	this study
	pEAW436	pAVA0581	Destroy NcoI and HindIII sites	this study
	pEJYW292	pEAW436	RPS3	this study
	pEJYW287	pEAW439	RPS3-K108E (quick change)	this study
	pYM45		Plasmid from Euroscarf containing HA-KanMX sequence	(Janke et al., 2004)
	pEJYW279		Bluscript with MBF1-HA+ KanR	this study
	pEJYW302	pEJYW279	mbf1-K64E-HA+ KanR	this study
	pEJYW307	pEJYW279	mbf1-I85T-HA+ KanR	this study
	pEKD1024		int, RFP-PGAL1,10-GFP, MET15	(Dean and Grayhack, 2012)
	pEAW012		int, RFP-PGAL1,10-Rluc-GFP, MET15	(Letzring et al., 2013)
	pEAW315		int, RFP-PGAL1,10-GLN4(1-99)-GFP, MET15	(Gamble et al., 2016)
	pEAW246	pEKD1024	GLN4(1-99)-(CGA)4+1-GFP	(Wolf and Grayhack, 2015)
	pEJYW166	pEAW246	Replace MET15 with HIS5 (S. pombe)	this study
	pEAW024	pEAW012	(CGA)4 in Rluc-GFP	(Letzring et al., 2013)
	pEAW026	pEAW012	(AGA)4 in Rluc-GFP	(Letzring et al., 2013)
	pECB498	pEAW012	(CGA)4+1 in Rluc-GFP	(Wolf and Grayhack, 2015)
	pECB490	pEAW012	(AGA)4+1 in Rluc-GFP	(Wolf and Grayhack, 2015)
	pECB502	pEAW012	(CGA)4-1 in Rluc-GFP	(Wolf and Grayhack, 2015)
	pECB494	pEAW012	(AGA)4-1 in Rluc-GFP	(Wolf and Grayhack, 2015)
	pEAW468	pEAW315	(AGA-AGA)3 in GLN4(1-99)-GFP	this study
	pEAW471	pEAW315	(CGA-CGA)3 in GLN4(1-99)-GFP	this study
	pEJYW321	pEAW315	(AGA-AGA)3+1 in GLN4(1-99)-GFP	this study
	pEAW474	pEAW315	(CGA-CGA)3+1 in GLN4(1-99)-GFP	this study
	pEJYW322	pEAW315	(AGA-AGA)3-1 in GLN4(1-99)-GFP	this study
	pEJYW323	pEAW315	(CGA-CGA)3-1 in GLN4(1-99)-GFP	this study
	pEJYW315	pEAW315	(AGA-CCA)3 in GLN4(1-99)-GFP	this study
	pEJYW318	pEAW315	(CGA-CCG)3 in GLN4(1-99)-GFP	this study
	pEJYW316	pEAW315	(AGA-CCA)3+1 in GLN4(1-99)-GFP	this study
	pEJYW319	pEAW315	(CGA-CCG)3+1 in GLN4(1-99)-GFP	this study
	pEJYW317	pEAW315	(AGA-CCA)3-1 in GLN4(1-99)-GFP	this study
	pEJYW320	pEAW315	(CGA-CCG)3-1 in GLN4(1-99)-GFP	this study
	pEJYW364	pEAW315	(AGA-AUU)3 in GLN4(1-99)-GFP	this study
	pEJYW363	pEAW315	(CGA-AUA)3 in GLN4(1-99)-GFP	this study
	pEJYW360	pEAW315	(AGA-AUU)3+1 in GLN4(1-99)-GFP	this study
	pEJYW325	pEAW315	(CGA-AUA)3+1 in GLN4(1-99)-GFP	this study
	pEJYW361	pEAW315	(AGA-AUU)3-1 in GLN4(1-99)-GFP	this study
	pEJYW359	pEAW315	(CGA-AUA)3-1 in GLN4(1-99)-GFP	this study
	pECB1814	pEAW315	(CGA-CGG)3 in GLN4(1-99)-GFP	this study
	pEJYW337	pEAW315	(CGA-CGG)3+1 in GLN4(1-99)-GFP	this study
	pEJYW338	pEAW315	(CGA-CGG)3-1 in GLN4(1-99)-GFP	this study
	pEJYW324	pEAW315	(AGG-CGA)3+1 in GLN4(1-99)-GFP	this study
	pEJYW326	pEAW315	(CGA-CUG)3+1 in GLN4(1-99)-GFP	this study
	pEJYW332	pEAW315	(CGA-GCG)3+1 in GLN4(1-99)-GFP	this study
	pEJYW327	pEAW315	(CUC-CCG)3+1 in GLN4(1-99)-GFP	this study
	pEJYW328	pEAW315	(CUG-CCG)3+1 in GLN4(1-99)-GFP	this study
	pEJYW329	pEAW315	(CUG-CGA)3+1 in GLN4(1-99)-GFP	this study
	pEJYW330	pEAW315	(GUA-CGA)3+1 in GLN4(1-99)-GFP	this study
	pEJYW331	pEAW315	(GUG-CGA)3+1 in GLN4(1-99)-GFP	this study
	pEAW119	pEAW012	No-Go sequence (in frame) in Rluc-GFP	this study
	pEAW121	pEAW012	No-Go sequence (+1 frame) in Rluc-GFP	this study
	pEAW126	pEAW012	No-Go sequence (-1 frame) in Rluc-GFP	this study
	pEAW161	pEAW012	TY1 sequence (in frame) in Rluc-GFP	this study
	pEAW165	pEAW012	TY1 sequence (-1 frame) in Rluc-GFP	this study
	pEAW169	pEAW012	TY1 sequence (+1 frame) in Rluc-GFP	this study
	pEJYW347	pEAW315	CGA-CGG+1 IIO construct in GLN4(1-99)-GFP	this study
	pEJYW348	pEAW315	CGA-CGG+1 IOI construct in GLN4(1-99)-GFP	this study
	pEJYW349	pEAW315	CGA-CGG+1 OII construct in GLN4(1-99)-GFP	this study
	pEJYW350	pEAW315	CGA-CGG+1 IOO construct in GLN4(1-99)-GFP	this study
	pEJYW351	pEAW315	CGA-CGG+1 OIO construct in GLN4(1-99)-GFP	this study
	pEJYW352	pEAW315	CGA-CGG+1 OOI construct in GLN4(1-99)-GFP	this study
	pEJYW367	pEAW315	CGA-CGG+1 IOO variant (add AAC upstream) in GLN4(1-99)-GFP	this study
	pEJYW368	pEAW315	CGA-CGG+1 IOO variant (add TCT downstream) in GLN4(1-99)-GFP	this study
	pEJYW369	pEAW315	CGA-CGG+1 IOO variant (add TTA upstream) in GLN4(1-99)-GFP	this study
	pEJYW370	pEAW315	CGA-CGG+1 IOO variant (add TTG upstream) in GLN4(1-99)-GFP	this study
	pEJYW371	pEAW315	CGA-CGG+1 IOO variant (change C to G downstream) in GLN4(1-99)-GFP	this study
	pEJYW375	pEAW315	revised (CGA-CGG)3 in GLN4(1-99)-GFP	this study
	pEJYW376	pEAW315	revised (CGA-CGG)3+1 in GLN4(1-99)-GFP	this study
	pEJYW377	pEAW315	revised (CGA-CGG)3-1 in GLN4(1-99)-GFP	this study
	pEJYW378	pEAW315	revised (AGA-AGA)3 in GLN4(1-99)-GFP	this study
	pEJYW379	pEAW315	revised (AGA-AGA)3+1 in GLN4(1-99)-GFP	this study
	pEJYW380	pEAW315	revised (AGA-AGA)3-1 in GLN4(1-99)-GFP	this study
	pEJZ001	pEAW315	CGA-CGG containing sequence of CUP2(in frame) in GLN4(1-99)-GFP	this study
	pEJZ005	pEAW315	CGA-CGG containing sequence of CUP2 (+1 frame) in GLN4(1-99)-GFP	this study
	pEJZ009	pEAW315	CGA-CGG containing sequence of AYT1 (in frame) in GLN4(1-99)-GFP	this study
	pEJZ013	pEAW315	CGA-CGG containing sequence of AYT1 (+1 frame) in GLN4(1-99)-GFP	this study
	pEJZ017	pEAW315	CGA-CGG containing sequence of FCP1 (in frame) in GLN4(1-99)-GFP	this study
	pEJZ021	pEAW315	CGA-CGG containing sequence of FCP1 (+1 frame) in GLN4(1-99)-GFP	this study
	pEJZ025	pEAW315	CGA-CGG containing sequence of PHO4 (in frame) in GLN4(1-99)-GFP	this study
	pEJZ029	pEAW315	CGA-CGG containing sequence of PHO4 (+1 frame) in GLN4(1-99)-GFP	this study
	pEJZ033	pEAW315	CGA-CGG containing sequence of RAD54 (in frame) in GLN4(1-99)-GFP	this study
	pEJZ037	pEAW315	CGA-CGG containing sequence of RAD54 (+1 frame) in GLN4(1-99)-GFP	this study
	pEJZ049	pEAW315	CGA-CGG containing sequence of GPT2(in frame) in GLN4(1-99)-GFP	this study
	pEJZ053	pEAW315	CGA-CGG containing sequence of GPT2 (+1 frame) in GLN4(1-99)-GFP	this study
	pEJZ057	pEAW315	CGA-CGG containing sequence of ARG81 (in frame) in GLN4(1-99)-GFP	this study
	pEJZ061	pEAW315	CGA-CGG containing sequence of ARG81 (+1 frame) in GLN4(1-99)-GFP	this study
	pEAW311		2µ, LEU2, PGal1-GST-LIC-HA-His6-ZZ	this study
	pEJYW398	pEAW311	in frame CGA-CGG with neighbor codons and StrepII tag as LIC insert	this study
	pEJYW399	pEAW311	+1 frame CGA-CGG with neighbor codons and StrepII tag as LIC insert	this study
	pDL867	pAVA0577	tR(ICG)	(Letzring et al., 2010)
	pELH108	pAVA0577	tD(GUC)	Personal Communication
	pDL871	pAVA0577	tR(CCG)	(Letzring et al., 2010)
	pEKD9080	pAVA0577	tG(GCC)	(Han et al., 2015)
	pMAB813A	pAVA0577	tH(GUG)	(Guy et al., 2012)
	pELH105	pAVA0577	tS(AGA)	(Han et al., 2015)
	pSP73		empty vector with SP6 and T7 RNA polymerase promoter, Promega P2221
	pEJYW407	pSP73	GFP fragment following T7 promoter	this study
	pEJYW409	pSP73	RFP fragment following T7 promoter	this study

## Sheet: SuppTable3
		Supplementary Table 3
		Oligonucleotides employed in this work
		Oligo ID	Description	Sequence (5'-3')
		OW125	ASC1 delta phleo (PCR deletion cassette), F	ATAACACACTAAAGTAAATAAAGTGAAAAGCGGCCGCCAGCTGAA
		OW126	ASC1 delta phelo (PCR deletion cassette), R	CATAAAAGAACAAATGAACTTTATACATATTCAAATAGGCCACTAGTGGATCTGAT
		OJYW085	P1 of URA3 reporter, CAN1-5'UTR URA3, F	TATGTACAATGAGCCGGTCACAACCCTCTTAACGGTTCATCATCTCATGGATCTGC
		OJYW086	P2 of URA3 reporter, Lic site 1-5' UTR URA3, R	ACAGCAGAAGACATGATTTATCTTCGTTTCCTGCAGG
		OJYW041	P3 of URA3 reporter, Lic site 1-start of GLN4, F	TGTCTTCTGCTGTAGAAGAATTGACTCAGCTGT
		OJYW089	P4 of URA3 reporter, (CGA)6+1-GLN4 near a.a. 99, R	TTCGTCGTCGTCGTCGTCGATTAGCCTTTACATATTTAAATGCG
		OJYW095	P5 of URA3 reporter, (CGA)6+1-URA3 codin region, F	CGACGACGACGACGACGAATCGAAAGCTACATATAAGGAACGTGCTG
		OJYW099	P6 of URA3 reporter, 3'UTR URA3-CAN1, R	TCGACATCTCCAATCTTCCAAATAAATCTGCATTGCCCTACACGTTCGCTATGCTTC
		OW441	RPS3 -457bp 5'UTR +lic, F	GGGTCCTGGTTCGAGCGAAGCAGTTACATCTCAACTAACATA
		OW442	RPS3 +475bp 3'UTR +lic, R	CTTGTTCGTGCTGTTTATTCAAGGCAAGGACAAGAATCGG
		OW443	RPS3 delta phleo (PCR deletion cassette), F	AGAAAAGAAAGCTAGTCGCTGACGGTGTCTTCTACCAGCTGAAGCTTCGTACGC
		OW445	RPS3 delta phleo (PCR deletion cassette), R	CTAAGCTTCAACTGGTTCAGCTTGAGCTTCAGTTTCGCATAGGCCACTAGTGGATCTG
		OW432	Ava581 HindIII-NCO1, F	AGCTGCTTGTTCGTGCTGTTTT
		OW433	Ava581 HindIII-NCO1, R	CATGAAAACAGCACGAACAAGC
		OJYW122	RPS3 A322G quick change, F	CTCAAGCTGAATCTATGAAATTCGAATTGTTGAACGGTTTGGCTATC
		OJYW123	RPS3 A322G quick change, R	GATAGCCAAACCGTTCAACAATTCGAATTTCATAGATTCAGCTTGAG
		OJYW159	RPS3 -165bp in 5'UTR, F	CTTTCTCCCATGGGCAGTGGT
		OJYW210	RPS3 +301bp in 3'UTR, R	GGCGTATACAAGTGGTGAAAACG
		OJYW124	PstI + 5'UTR (-580bp) of MBF1, F	CATGTCCTGCAGCAGATCCTTCTTCTATTCCTGGC
		OJYW125	HindIII + 3' UTR (+300bp) of MBF1, R	GTCTACAAGCTTCTCGCATACAATGATGAGAGTTTAG
		OJYW157	XmaI + 5'UTR (-580bp) of MBF1, F	GAGTCACCCGGGCAGATCCTTCTTCTATTCCTGGC
		OJYW158	NheI + 3' UTR(+1992bp, including KanR) of MBF1, R	CTCATGGCTAGCACTCGCATACAATGATGAGAGTTTAG
		OJYW130	MBF1 upstream of stop codon + template, F	GGTAACAACATCGGTTCGCCTTTGGGAGCTCCAAAGAAGAAACGTACGCTGCAGGTCGAC
		OJYW132	MBF1 downstream of stop codon + template, R	CAGTGCGAAAAGAAAGGAACAAATGAAAGAAGACCTCTTCAATCGATGAATTCGAGCTCG
		OJYW170	BamHI + mbf1-I85T mutation, F	GAAATTGGATCCAAATGTCGGTAGGGCCACCTCGCGTGCCAGAAC
		OJYW166	AatII + MBF1-HA near stop codon, R	TAGTCTGGGACGTCGTATGGGTAGTCGACCTGCAGCGTACGTTTCTTCTTTGGAGCTCCC
		OJYW225	HIS3 -696bp 5'UTR, F	AATAGTGCCATGGTACAGCAACCG
		OJYW226	HIS3 +407bp 3'UTR, R	ATTTCTGGCACTTCTTGGTTTTCCTC
		OCB721	RT-qPCR GFP Internal, F	TATACATCACGGCAGACAAACA
		OCB722	RT-qPCR GFP Internal, R	GCTAGTTGAACGGAACCATCT
		OCB855	RT-qPCR RFP Internal, F	ACAGTAACAACACCACCATCTT
		OCB856	RT-qPCR RFP Internal, R	ACATCCAGCTGATATTCCAGATT
		OJYW295	SphI+GFP, F	CTACGTGCATGCCTTGGACACAAACTCGAGTACAA
		OJYW296	XmaI+GFP, R	CATCGTCCCGGGTTAGTGATGGTGATGGTGATGG
		OJYW297	SphI+RFP, F	CTACGTGCATGCGGTTTCAAAAGGTGAAGAAGATAATATG
		OJYW299	XmaI+RFP+, R	CATCGTCCCGGGCTTTATAAATAAATTCACCATCTTGTAATGAT
		OJYW272	SLH1 -206bp 5'UTR, F	GAAATAGATTTAAAACCACACCTTGTATA
		OJYW273	SLH1 +212bp 3'UTR, R	CACCTGATAAAGATCATGAGGATG
		OJYW278	HEL2 -197bp 5'UTR, F	CGCGGTCACTCTTAATAATAGCTA
		OJYW280	HEL2 +182bp 3'UTR, R	GGCCTTTTTCAGAAATAACGCAG
		OW395	insert (AGA-AGA)3 (3 frames) into pEAW315, F	ACCTCTACTAACTTAAGAAGACACAACAGAAGATCTGTTAGAAGA
		OW396	insert (AGA-AGA)3 into pEAW315, R	CTTCCAAACCACATCTTCTAACAGATCTTCTGTTGTGTCTTCT
		OJYW178	insert (AGA-AGA)3+1 into pEAW315, R	CTTCCAAACCACAGTCTTCTAACAGATCTTCTGTTGTGTCTTCT
		OJYW179	insert (AGA-AGA)3-1 into pEAW315, R	CTTCCAAACCACAGGTCTTCTAACAGATCTTCTGTTGTGTCTTCT
		OW392	insert (CGA-CGA)3 (3 frames) into pEAW315, F	ACCTCTACTAACTTACGACGACACAACCGACGATCTGTTCGACGA
		OW393	insert (CGA-CGA)3 into pEAW315, R	CTTCCAAACCACATCGTCGAACAGATCGTCGGTTGTGTCGTCG
		OW394	insert (CGA-CGA)3+1 into pEAW315, R	CTTCCAAACCACAGTCGTCGAACAGATCGTCGGTTGTGTCGTCG
		OJYW180	insert (CGA-CGA)3-1 into pEAW315, R	CTTCCAAACCACAGGTCGTCGAACAGATCGTCGGTTGTGTCGTCG
		OW384	insert (AGA-CCA)3 (3 frames) into pEAW315, F	ACCTCTACTAACTTAAGACCACACAACAGACCATCTGTTAGACCA
		OW385	insert (AGA-CCA)3 into pEAW315, R	CTTCCAAACCACATGGTCTAACAGATGGTCTGTTGTGTGGTCT
		OW386	insert (AGA-CCA)3+1 into pEAW315, R	CTTCCAAACCACAGTGGTCTAACAGATGGTCTGTTGTGTGGTCT
		OW387	insert (AGA-CCA)3-1 into pEAW315, R	CTTCCAAACCACAGGTGGTCTAACAGATGGTCTGTTGTGTGGTCT
		OW388	insert (CGA-CCG)3 (3 frames) into pEAW315, F	ACCTCTACTAACTTACGACCGCACAACCGACCGTCTGTTCGACCG
		OW389	insert (CGA-CCG)3 into pEAW315, R	CTTCCAAACCACACGGTCGAACAGACGGTCGGTTGTGCGGTCG
		OW390	insert (CGA-CCG)3+1 into pEAW315, R	CTTCCAAACCACAGCGGTCGAACAGACGGTCGGTTGTGCGGTCG
		OW391	insert (CGA-CCG)3-1 into pEAW315, R	CTTCCAAACCACAGGCGGTCGAACAGACGGTCGGTTGTGCGGTCG
		OCB1039	insert (AGA-AUU)3 (3 frames) into pEAW315, F	ACCTCTACTAACTTAAGAATTCACAACAGAATTTCTGTTAGAATT
		OCB1040	insert (AGA-AUU)3 into pEAW315, R	CTTCCAAACCACAAATTCTAACAGAAATTCTGTTGTGAATTCT
		OJYW205	insert (AGA-AUU)3+1 into pEAW315, R	CTTCCAAACCACAGAATTCTAACAGAAATTCTGTTGTGAATTCT
		OJYW206	insert (AGA-AUU)3-1 into pEAW315, R	CTTCCAAACCACAGGAATTCTAACAGAAATTCTGTTGTGAATTCT
		OCB1035	insert (CGA-AUA)3 (3 frames) into pEAW315, F	ACCTCTACTAACTTACGAATACACAACCGAATATCTGTTCGAATA
		OCB1036	insert (CGA-AUA)3 into pEAW315, R	CTTCCAAACCACATATTCGAACAGATATTCGGTTGTGTATTCG
		OJYW182	insert (CGA-AUA)3+1 into pEAW315, R	CTTCCAAACCACAGTATTCGAACAGATATTCGGTTGTGTATTCG
		OJYW204	insert (CGA-AUA)3-1 into pEAW315, R	CTTCCAAACCACAGGTATTCGAACAGATATTCGGTTGTGTATTCG
		OBB09	insert (CGA-CGG)3 (3 frames) into pEAW315, F	ACCTCTACTAACTTACGACGGCACAACCGACGGTCTGTTCGACGG
		OBB10	insert (CGA-CGG)3 into pEAW315, R	CTTCCAAACCACACCGTCGAACAGACCGTCGGTTGTGCCGTCG
		OJYW141	insert (CGA-CGG)3+1 into pEAW315, R	CTTCCAAACCACAGCCGTCGAACAGACCGTCGGTTGTGCCGTCG
		OJYW142	insert (CGA-CGG)3-1 into pEAW315, R	CTTCCAAACCACAGGCCGTCGAACAGACCGTCGGTTGTGCCGTCG
		OBB25	insert (AGG-CGA)3 (3 frames) into pEAW315, F	ACCTCTACTAACTTAAGGCGACACAACAGGCGATCTGTTAGGCGA
		OJYW181	insert (AGG-CGA)3+1 into pEAW315, R	CTTCCAAACCACAGTCGCCTAACAGATCGCCTGTTGTGTCGCCT
		OBB15	insert (CGA-CUG)3 (3 frames) into pEAW315, F	ACCTCTACTAACTTACGACTGCACAACCGACTGTCTGTTCGACTG
		OJYW183	insert (CGA-CUG)3+1 into pEAW315, R	CTTCCAAACCACAGCAGTCGAACAGACAGTCGGTTGTGCAGTCG
		OBB01	insert (CGA-GCG)3 (3 frames) into pEAW315, F	ACCTCTACTAACTTACGAGCGCACAACCGAGCGTCTGTTCGAGCG
		OJYW135	insert (CGA-GCG)3+1 into pEAW315, R	CTTCCAAACCACAGCGCTCGAACAGACGCTCGGTTGTGCGCTCG
		OBB05	insert (CUC-CCG)3 (3 frames) into pEAW315, F	ACCTCTACTAACTTACTCCCGCACAACCTCCCGTCTGTTCTCCCG
		OJYW184	insert (CUC-CCG)3+1 into pEAW315, R	CTTCCAAACCACAGCGGGAGAACAGACGGGAGGTTGTGCGGGAG
		OBB13	insert (CUG-CCG)3 (3 frames) into pEAW315, F	ACCTCTACTAACTTACTGCCGCACAACCTGCCGTCTGTTCTGCCG
		OJYW185	insert (CUG-CCG)3+1 into pEAW315, R	CTTCCAAACCACAGCGGCAGAACAGACGGCAGGTTGTGCGGCAG
		OBB23	insert (CUG-CGA)3 (3 frames) into pEAW315, F	ACCTCTACTAACTTACTGCGACACAACCTGCGATCTGTTCTGCGA
		OJYW186	insert (CUG-CGA)3+1 into pEAW315, R	CTTCCAAACCACAGTCGCAGAACAGATCGCAGGTTGTGTCGCAG
		OBB19	insert (GUA-CGA)3 (3 frames) into pEAW315, F	ACCTCTACTAACTTAGTACGACACAACGTACGATCTGTTGTACGA
		OJYW187	insert (GUA-CGA)3+1 into pEAW315, R	CTTCCAAACCACAGTCGTACAACAGATCGTACGTTGTGTCGTAC
		OBB27	insert (GUG-CGA)3 (3 frames) into pEAW315, F	ACCTCTACTAACTTAGTGCGACACAACGTGCGATCTGTTGTGCGA
		OJYW188	insert (GUG-CGA)3+1 into pEAW315, R	CTTCCAAACCACAGTCGCACAACAGATCGCACGTTGTGTCGCAC
		OW115	insert No-Go sequence (3 frames) into pEAW315, F	ACCTCTACTAACTTAGATATCCCGTGGAGGGGCGCGTGGTGGCGGCTG
		OW116	insert No-Go sequence into pEAW315, R	CTTCCAAACCACTGATATCCCGTGGAGGGGCGCGTGGTGGCGGCTGCAGCCGCCAC
		OW117	insert No-Go sequence +1 into pEAW315, R	CTTCCAAACCACTTGATATCCCGTGGAGGGGCGCGTGGTGGCGGCTGCAGCCGCCAC
		OW118	insert No-Go sequence -1 into pEAW315, R	CTTCCAAACCACTTTGATATCCCGTGGAGGGGCGCGTGGTGGCGGCTGCAGCCGCCAC
		OW238	insert TY1 (3 frames) into pEAW315, F	ACCTCTACTAACTTAGAGATGAACCTTAGGCCAGGAACC
		OW239	insert TY1 into pEAW315, R	CTTCCAAACCACTCCAGGTTCCTGGCCT
		OW240	insert TY1 +1 into pEAW315, R	CTTCCAAACCACTCTCAGGTTCCTGGCCT
		OW241	insert TY1 -1 into pEAW315, R	CTTCCAAACCACTCAGGTTCCTGGCCT
		OJYW195	insert CGA-CGG Dose IIO +1 into pEAW315, F	ACCTCTACTAACTTACGACGGCACAACCGACGGTCTGTTAGAAGA
		OJYW196	insert CGA-CGG Dose IOI +1 into pEAW315, F	ACCTCTACTAACTTACGACGGCACAACAGAAGATCTGTTCGACGG
		OJYW197	insert CGA-CGG Dose OII +1 into pEAW315, F	ACCTCTACTAACTTAAGAAGACACAACCGACGGTCTGTTCGACGG
		OJYW198	insert CGA-CGG Dose IOO +1 into pEAW315, F	ACCTCTACTAACTTACGACGGCACAACAGAAGATCTGTTAGAAGA
		OJYW199	insert CGA-CGG Dose OIO +1 into pEAW315, F	ACCTCTACTAACTTAAGAAGACACAACCGACGGTCTGTTAGAAGA
		OJYW200	insert CGA-CGG Dose OOI +1 into pEAW315, F	ACCTCTACTAACTTAAGAAGACACAACAGAAGATCTGTTCGACGG
		OJYW189	insert CGA-CGG Dose IIO +1 into pEAW315, R	CTTCCAAACCACAGTCTTCTAACAGACCGTCGGTTGTGCCGTCG
		OJYW190	insert CGA-CGG Dose IOI +1 into pEAW315, R	CTTCCAAACCACAGCCGTCGAACAGATCTTCTGTTGTGCCGTCG
		OJYW191	insert CGA-CGG Dose OII +1 into pEAW315, R	CTTCCAAACCACAGCCGTCGAACAGACCGTCGGTTGTGTCTTCT
		OJYW192	insert CGA-CGG Dose IOO +1 into pEAW315, R	CTTCCAAACCACAGTCTTCTAACAGATCTTCTGTTGTGCCGTCG
		OJYW193	insert CGA-CGG Dose OIO +1 into pEAW315, R	CTTCCAAACCACAGTCTTCTAACAGACCGTCGGTTGTGTCTTCT
		OJYW194	insert CGA-CGG Dose OOI +1 into pEAW315, R	CTTCCAAACCACAGCCGTCGAACAGATCTTCTGTTGTGTCTTCT
		OJYW219	insert CGA-CGG+1 IOO variant (add AAC upstream) into pEAW315, F	ACCTCTACTAACTTAAACCGACGGCACAACAGAAGATCTGTTAGAAGA
		OJYW220	insert CGA-CGG+1 IOO variant (add TCT downstream) into pEAW315, F	ACCTCTACTAACTTACGACGGTCTCACAACAGAAGATCTGTTAGAAGA
		OJYW221	insert CGA-CGG+1 IOO variant (add TCT downstream) into pEAW315, R	CTTCCAAACCACAGTCTTCTAACAGATCTTCTGTTGTGAGACCGTCG
		OJYW222	insert CGA-CGG+1 IOO variant (add TTA upstream) into pEAW315, F	ACCTCTACTAACTTATTACGACGGCACAACAGAAGATCTGTTAGAAGA
		OJYW223	insert CGA-CGG+1 IOO variant (add TTG upstream) into pEAW315, F	ACCTCTACTAACTTATTGCGACGGCACAACAGAAGATCTGTTAGAAGA
		OJYW224	insert CGA-CGG+1 IOO variant (change C to G downstream) into pEAW315, F	ACCTCTACTAACTTACGACGGGACAACAGAAGATCTGTTAGAAGA
		OJYW225A	insert CGA-CGG+1 IOO variant (change C to G downstream) into pEAW315, R	CTTCCAAACCACAGTCTTCTAACAGATCTTCTGTTGTCCCGTCG
		OJYW251	insert revised (CGA-CGG)3 (3 frames) into pEAW315, F	ACCTCTACTAACTTACGACGGTTCAACCGACGGTCTGTTCGACGG
		OJYW252	insert revised (CGA-CGG)3 into pEAW315, R	CTTCCAAACCACACCGTCGAACAGACCGTCGGTTGAACCGTCG
		OJYW253	insert revised (CGA-CGG)3+1 into pEAW315, R	CTTCCAAACCACAGCCGTCGAACAGACCGTCGGTTGAACCGTCG
		OJYW254	insert revised (CGA-CGG)3-1 into pEAW315, R	CTTCCAAACCACAGGCCGTCGAACAGACCGTCGGTTGAACCGTCG
		OJYW255	insert revised (AGA-AGA)3 (3 frames) into pEAW315, F	ACCTCTACTAACTTAAGAAGATTCAACAGAAGATCTGTTAGAAGA
		OJYW256	insert revised (AGA-AGA)3 into pEAW315, R	CTTCCAAACCACATCTTCTAACAGATCTTCTGTTGAATCTTCT
		OJYW257	insert revised (AGA-AGA)3+1 into pEAW315, R	CTTCCAAACCACAGTCTTCTAACAGATCTTCTGTTGAATCTTCT
		OJYW258	insert revised (AGA-AGA)3-1 into pEAW315, R	CTTCCAAACCACAGGTCTTCTAACAGATCTTCTGTTGAATCTTCT
		OJZ024	insert CUP2 sequence (3 frames) into pEAW315, F	ACCTCTACTAACTTATGCATGTGTGCCTCTGCACGACGGCCAGCTGTTGGCAGCAAG
		OJZ025	insert CUP2 sequence (0 frame) into pEAW315, R	CTTCCAAACCACACTTGCTGCCAACAGCTGGCCGTCGTGCAGAGGCACACATGCA
		OJZ026	insert CUP2 sequence (+1 frame) into pEAW315, R	CTTCCAAACCACACCTTGCTGCCAACAGCTGGCCGTCGTGCAGAGGCACACATGCA
		OJZ027	insert AYT1 sequence (3 frames) into pEAW315, F	ACCTCTACTAACTTAGGGAAGCCCAAGAGTGTACGACGGCCGCGCTTCATTTCCCTT
		OJZ028	insert AYT1 sequence (0 frame) into pEAW315, R	CTTCCAAACCACAAAGGGAAATGAAGCGCGGCCGTCGTACACTCTTGGGCTTCCC
		OJZ029	insert AYT1 sequence (+1 frame) into pEAW315, R	CTTCCAAACCACACAAGGGAAATGAAGCGCGGCCGTCGTACACTCTTGGGCTTCCC
		OJZ030	insert FCP1 sequence (3 frames) into pEAW315, F	ACCTCTACTAACTTAGCATTGAAGGAGCATTTGCGACGGGATAAGAAACTTATCTTA
		OJZ031	insert FCP1 sequence (0 frame) into pEAW315, R	CTTCCAAACCACATAAGATAAGTTTCTTATCCCGTCGCAAATGCTCCTTCAATGC
		OJZ032	insert FCP1 sequence (+1 frame) into pEAW315, R	CTTCCAAACCACACTAAGATAAGTTTCTTATCCCGTCGCAAATGCTCCTTCAATGC
		OJZ033	insert PHO4 sequence (3 frames) into pEAW315, F	ACCTCTACTAACTTATCGCGGTCGCTGAGTAAGCGACGGTCATCGGGCGCGCTCGTG
		OJZ034	insert PHO4 sequence (0 frame) into pEAW315, R	CTTCCAAACCACACACGAGCGCGCCCGATGACCGTCGCTTACTCAGCGACCGCGA
		OJZ035	insert PHO4 sequence (+1 frame) into pEAW315, R	CTTCCAAACCACACCACGAGCGCGCCCGATGACCGTCGCTTACTCAGCGACCGCGA
		OJZ036	insert RAD54 sequence (3 frames) into pEAW315, F	ACCTCTACTAACTTATTTTCTCAGTTGACTAAACGACGGAAGGATGCTCTTAGTGCT
		OJZ037	insert RAD54 sequence (0 frame) into pEAW315, R	CTTCCAAACCACAAGCACTAAGAGCATCCTTCCGTCGTTTAGTCAACTGAGAAAA
		OJZ038	insert RAD54 sequence (+1 frame) into pEAW315, R	CTTCCAAACCACAGAGCACTAAGAGCATCCTTCCGTCGTTTAGTCAACTGAGAAAA
		OJZ042	insert GPT2 sequence (3 frames) into pEAW315, F	ACCTCTACTAACTTACATGTACCTCAAGCGTCCCGACGGTACAAAAATTCATACAAT
		OJZ043	insert GPT2 sequence (0 frame) into pEAW315, R	CTTCCAAACCACAATTGTATGAATTTTTGTACCGTCGGGACGCTTGAGGTACATG
		OJZ044	insert GPT2 sequence (+1 frame) into pEAW315, R	CTTCCAAACCACACATTGTATGAATTTTTGTACCGTCGGGACGCTTGAGGTACATG
		OJZ045	insert ARG81 sequence (3 frames) into pEAW315, F	ACCTCTACTAACTTAGATGAACCACAATACCAACGACGGAACATCGATTTTGTGCGC
		OJZ046	insert ARG81 sequence (0 frame) into pEAW315, R	CTTCCAAACCACAGCGCACAAAATCGATGTTCCGTCGTTGGTATTGTGGTTCATC
		OJZ047	insert ARG81 sequence (+1 frame) into pEAW315, R	CTTCCAAACCACAAGCGCACAAAATCGATGTTCCGTCGTTGGTATTGTGGTTCATC
		OW495	GST tag, F	AATTCCATCAACCTTAAAAATGACCAAGTTACCTATACTAGGTT
		OW496	GST tag, R	TACCACTATTAATTAAGTTAGTAGAGGTCATGGTGGTCAGCTGGAATT
		OJYW285	insert in frame or +1 CGA-CGG with StrepII tag into pEAW311, F	ACCTCTACTAACTTAACTTTAGAGGCTCAAACTCAGGGTCCTGGATCTAA
		OJYW286	insert in frame CGA-CGG with StrepII tag into pEAW311, F	GGTCACTAACTTACGACGGGGCACAACCTGGTCTCACCCACAATTCGAAAAAA
		OJYW287	insert in frame or +1 CGA-CGG with StrepII tag into pEAW311, R	GTAAGTTAGTGACCTTAGATCCAGGACCCTGAGTTTGAGCCTCTAAAGT
		OJYW288	insert in frame CGA-CGG with StrepII tag into pEAW311, R	CTTCCAAACCACTTTTTTCGAATTGTGGGTGAGACCAGGTTGTGCCCCGTC
		OJYW289	insert +1 frame CGA-CGG with StrepII tag into pEAW311, F	GGTCACTAACTTACGACGGCACAACCTGGTCTCACCCACAATTCGAAAAAA
		OJYW290	insert +1 frame CGA-CGG with StrepII tag into pEAW311, R	CTTCCAAACCACTTTTTTCGAATTGTGGGTGAGACCAGGTTGTGCCGTC
