# Supplementary figures and images for: Multi-protein bridging factor 1(Mbf1), Rps3 and Asc1 prevent stalled ribosomes from frameshifting
Source: eLife journal article supplement (doi:10.7554/elife.39637), 2018-11-22

Figure 1-figure supplement 1

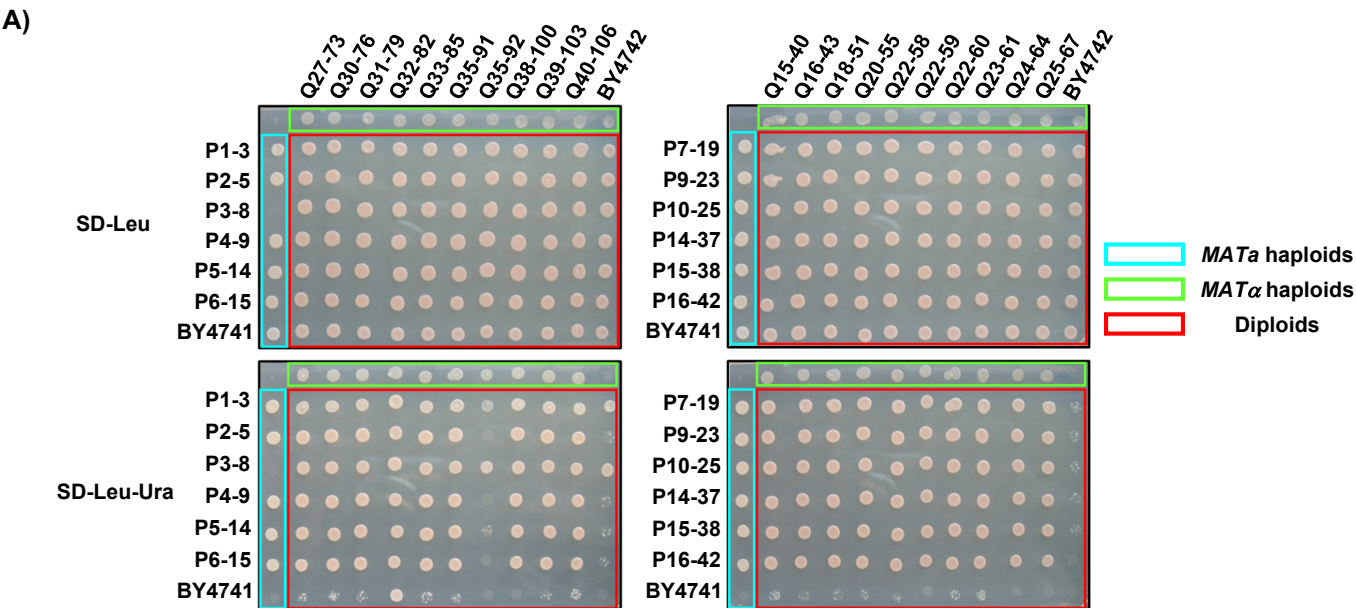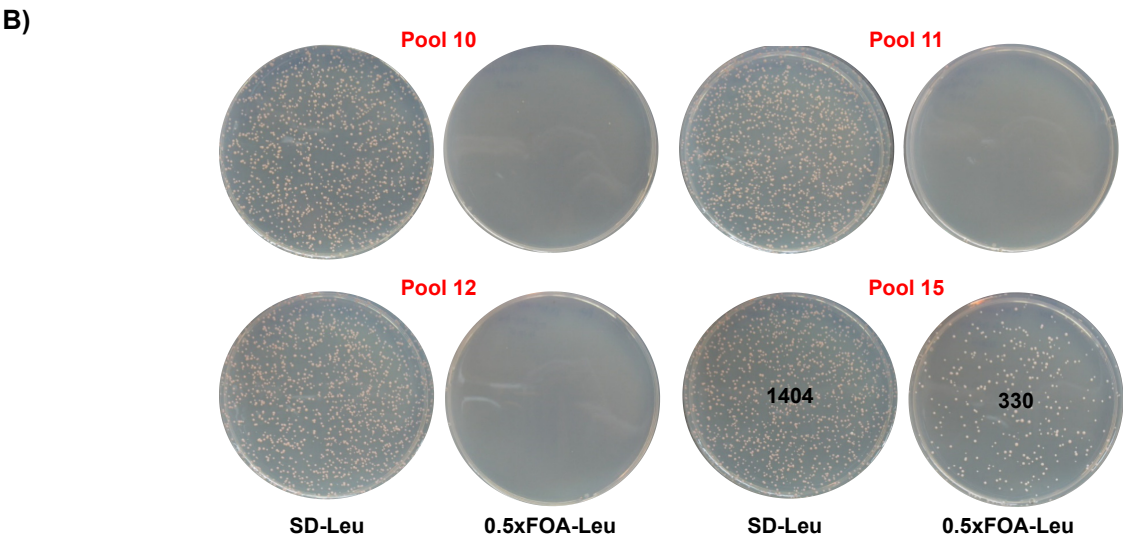

Supplement: supp [file elife_poa_e39637_Figure_1_figure_supplement_1.pdf › elife_poa_e39637_Figure_1_figure_supplement_1.pdf]

Figure 1-figure supplement 2

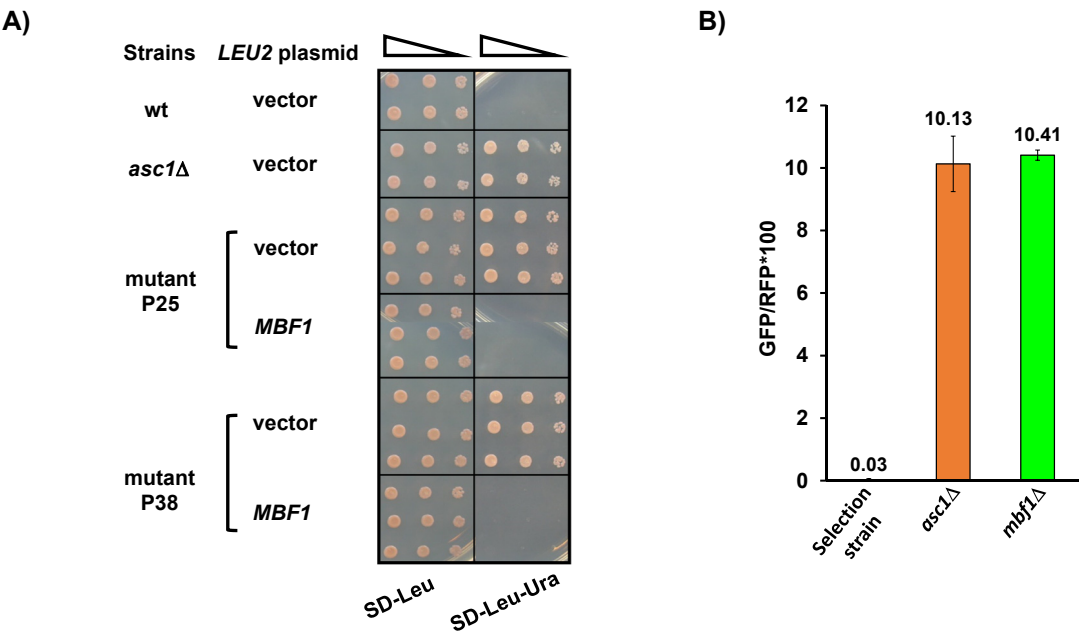

Supplement: supp [file elife_poa_e39637_Figure_1_figure_supplement_2.pdf › elife_poa_e39637_Figure_1_figure_supplement_2.pdf]

Figure 1-figure supplement 3

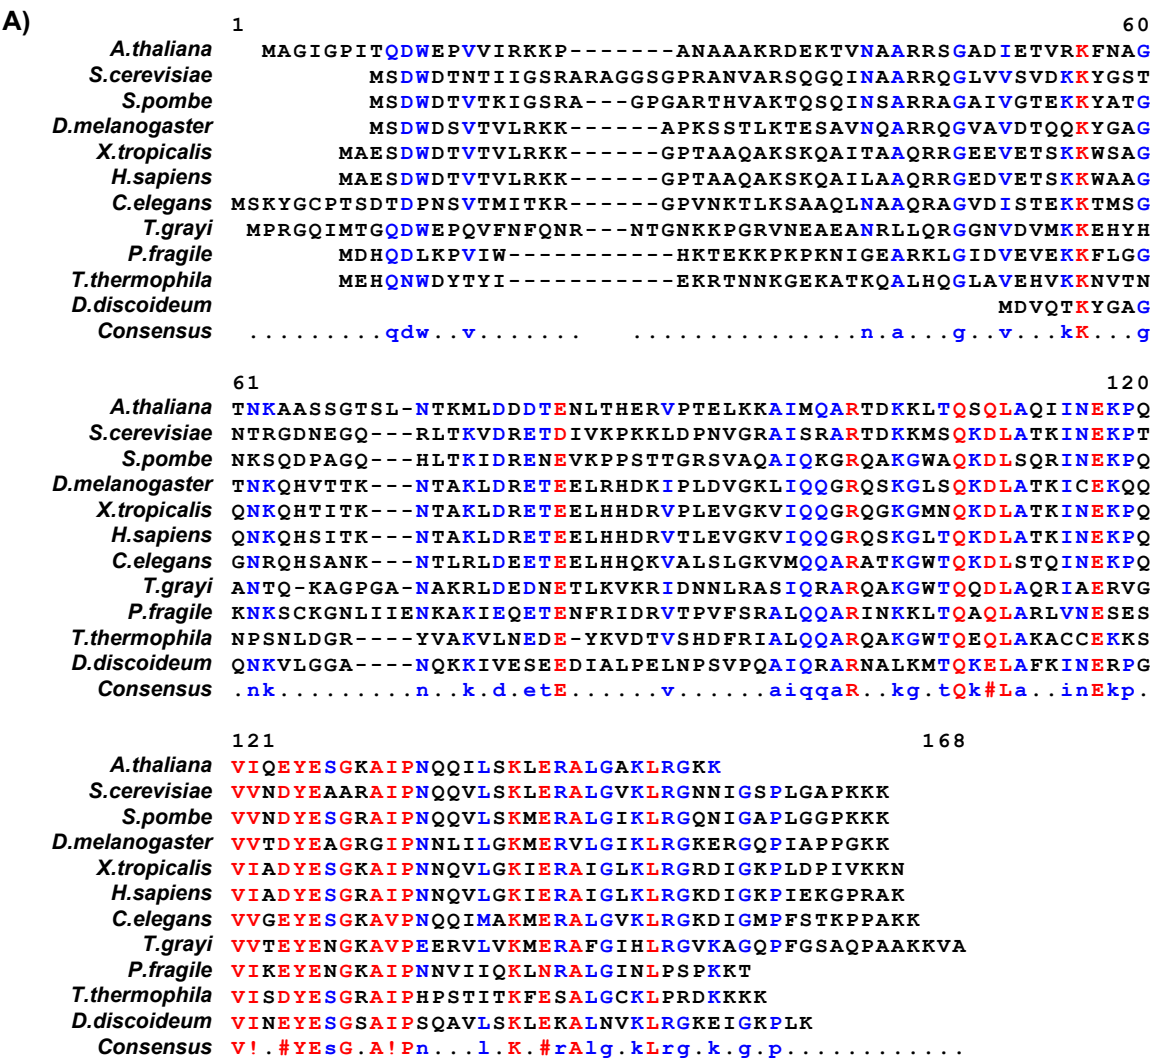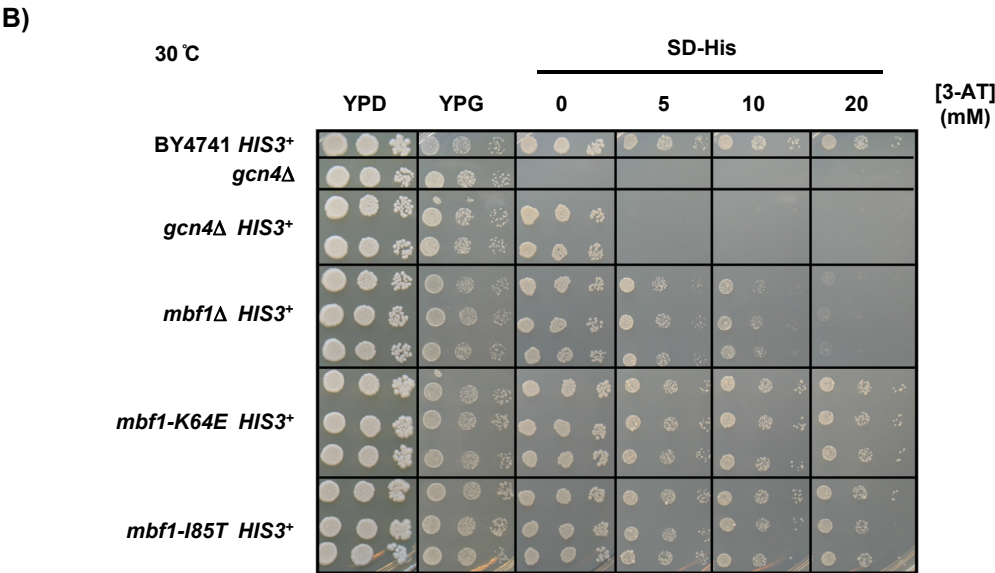

Supplement: supp [file elife_poa_e39637_Figure_1_figure_supplement_3.pdf › elife_poa_e39637_Figure_1_figure_supplement_3.pdf]

Figure 2-figure supplement 1

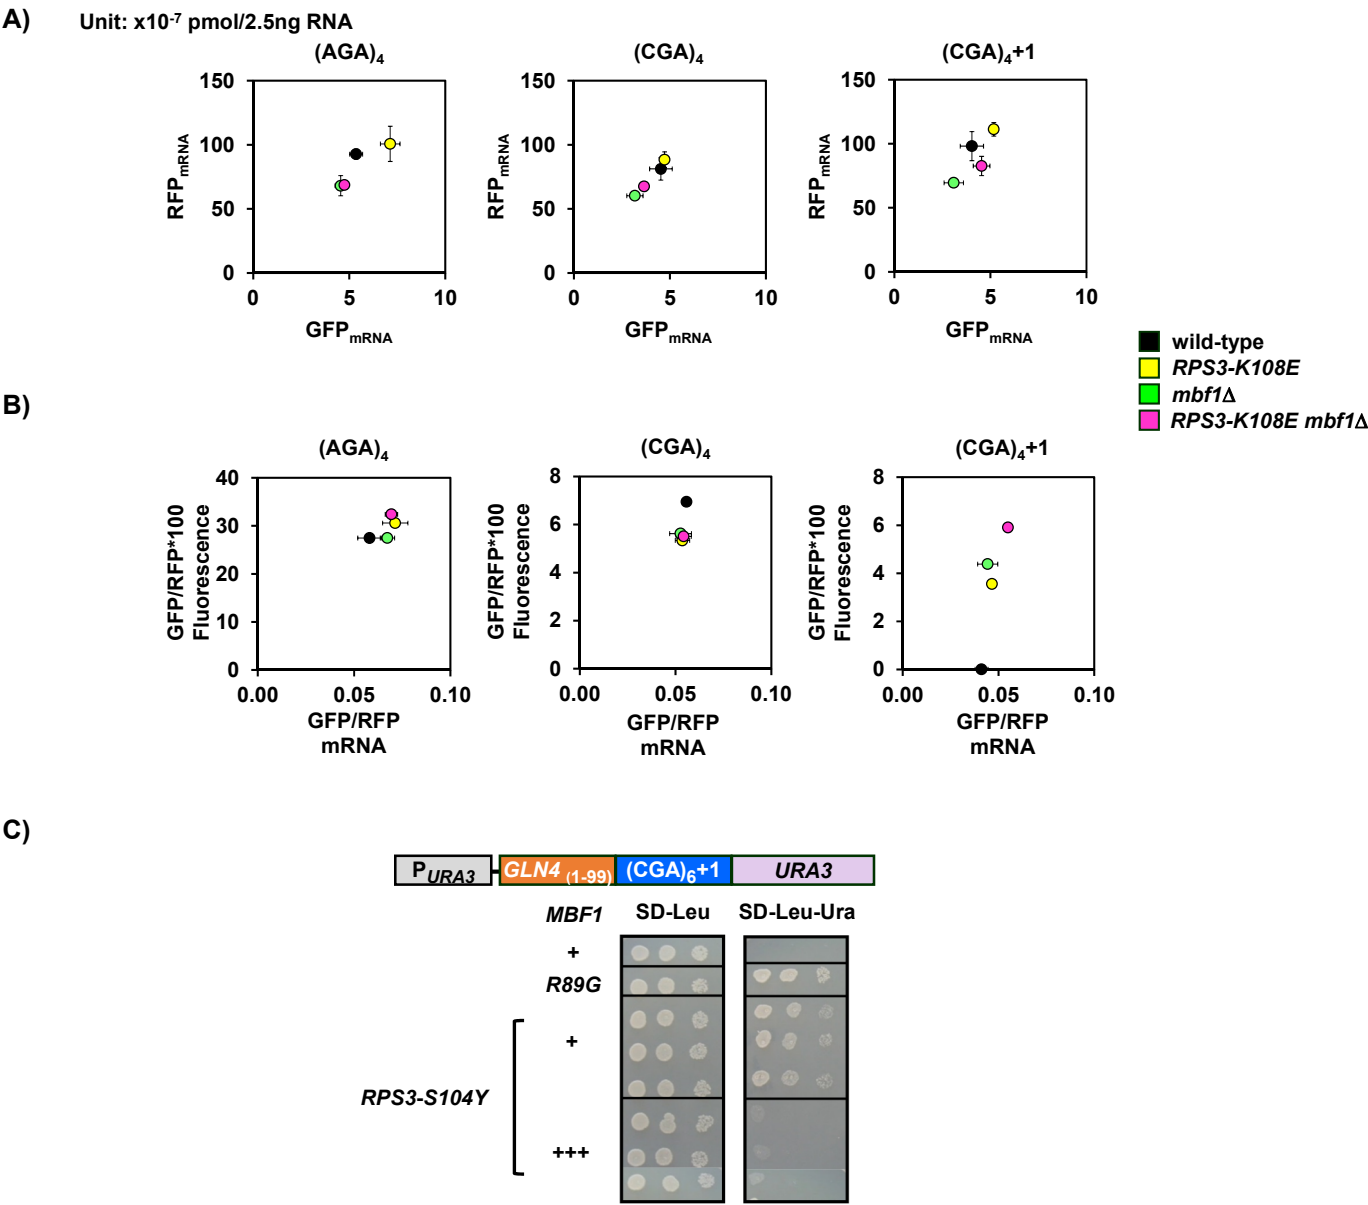

Supplement: supp [file elife_poa_e39637_Figure_2_figure_supplement_1.pdf › elife_poa_e39637_Figure_2_figure_supplement_1.pdf]

Figure 3-figure supplement 1

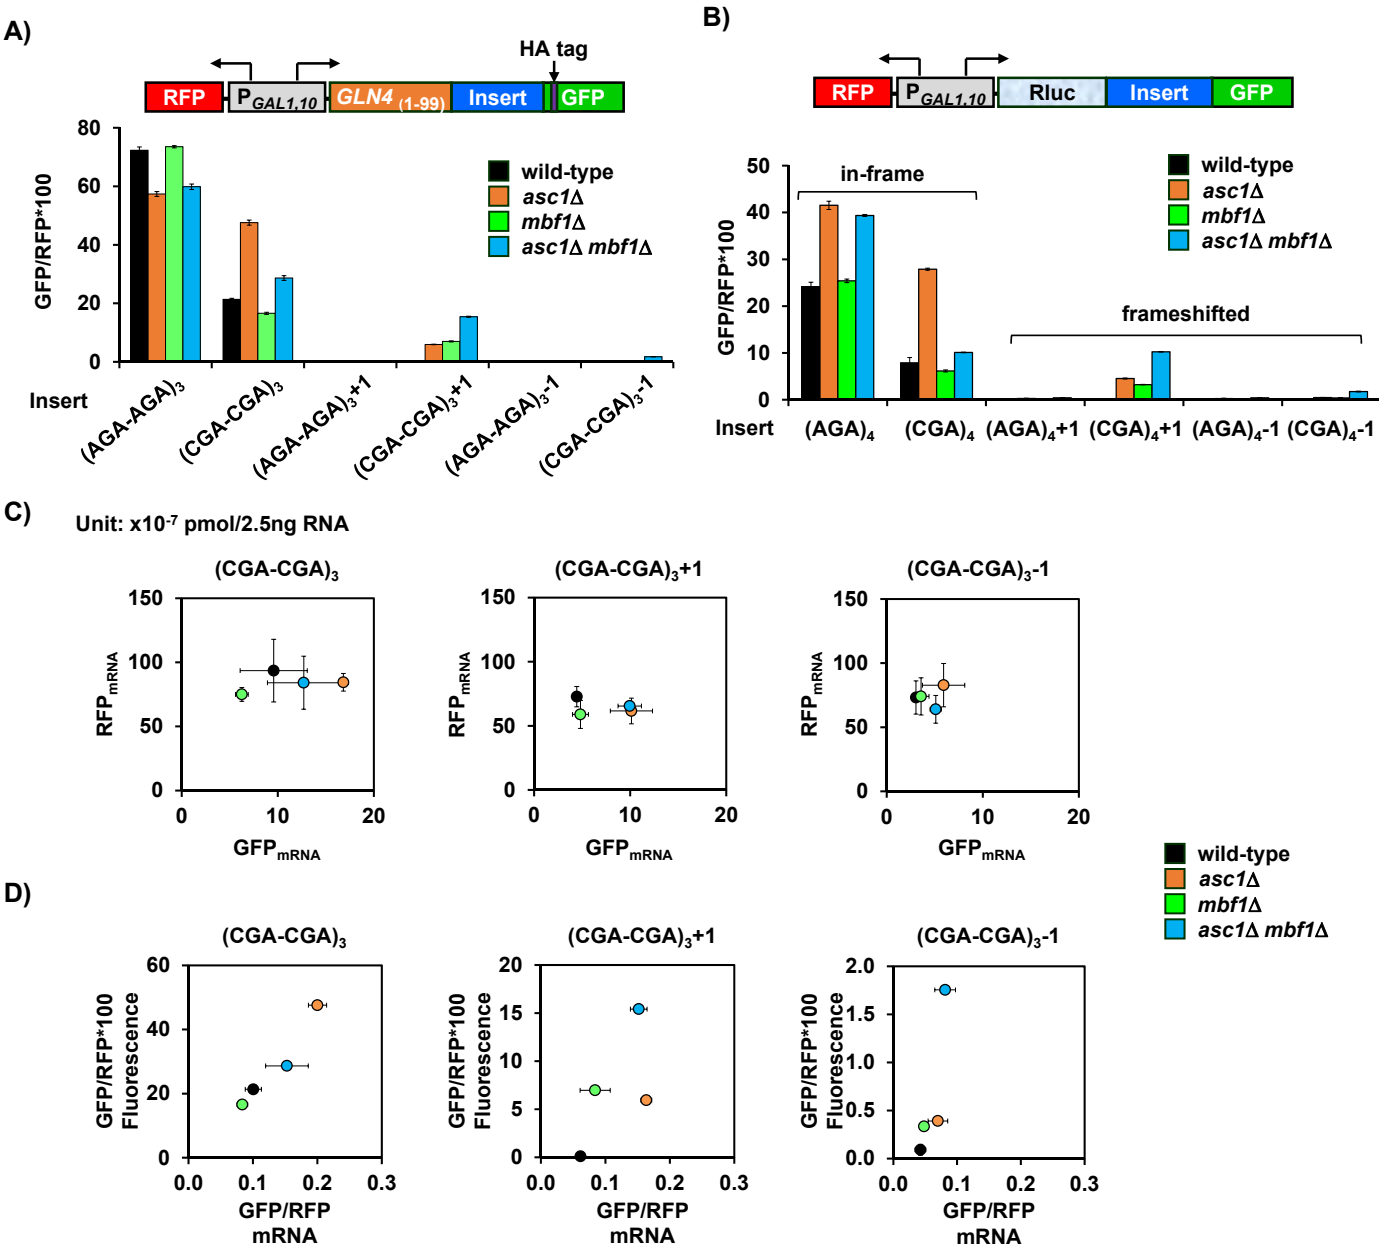

Supplement: supp [file elife_poa_e39637_Figure_3_figure_supplement_1.pdf › elife_poa_e39637_Figure_3_figure_supplement_1.pdf]

Figure 3-figure supplement 2

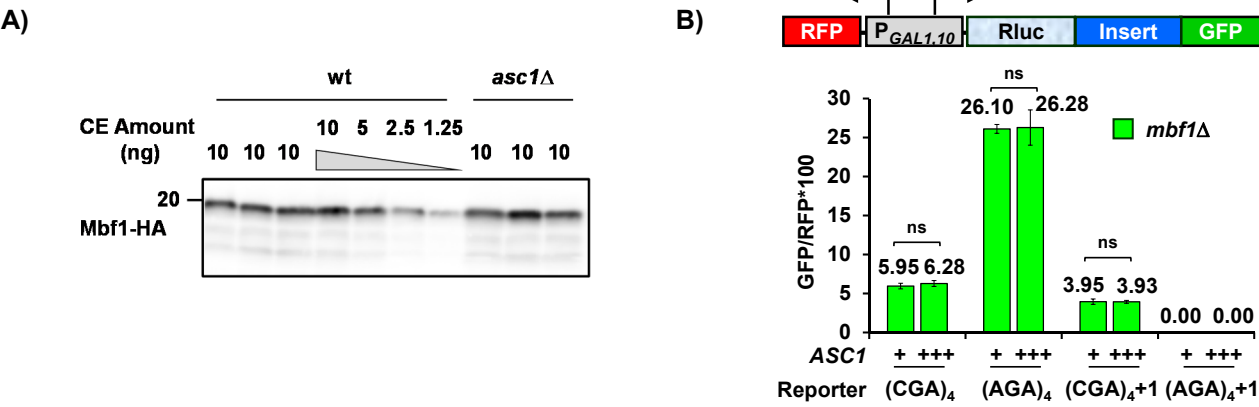

Supplement: supp [file elife_poa_e39637_Figure_3_figure_supplement_2.pdf › elife_poa_e39637_Figure_3_figure_supplement_2.pdf]

Figure 4-figure supplement 1

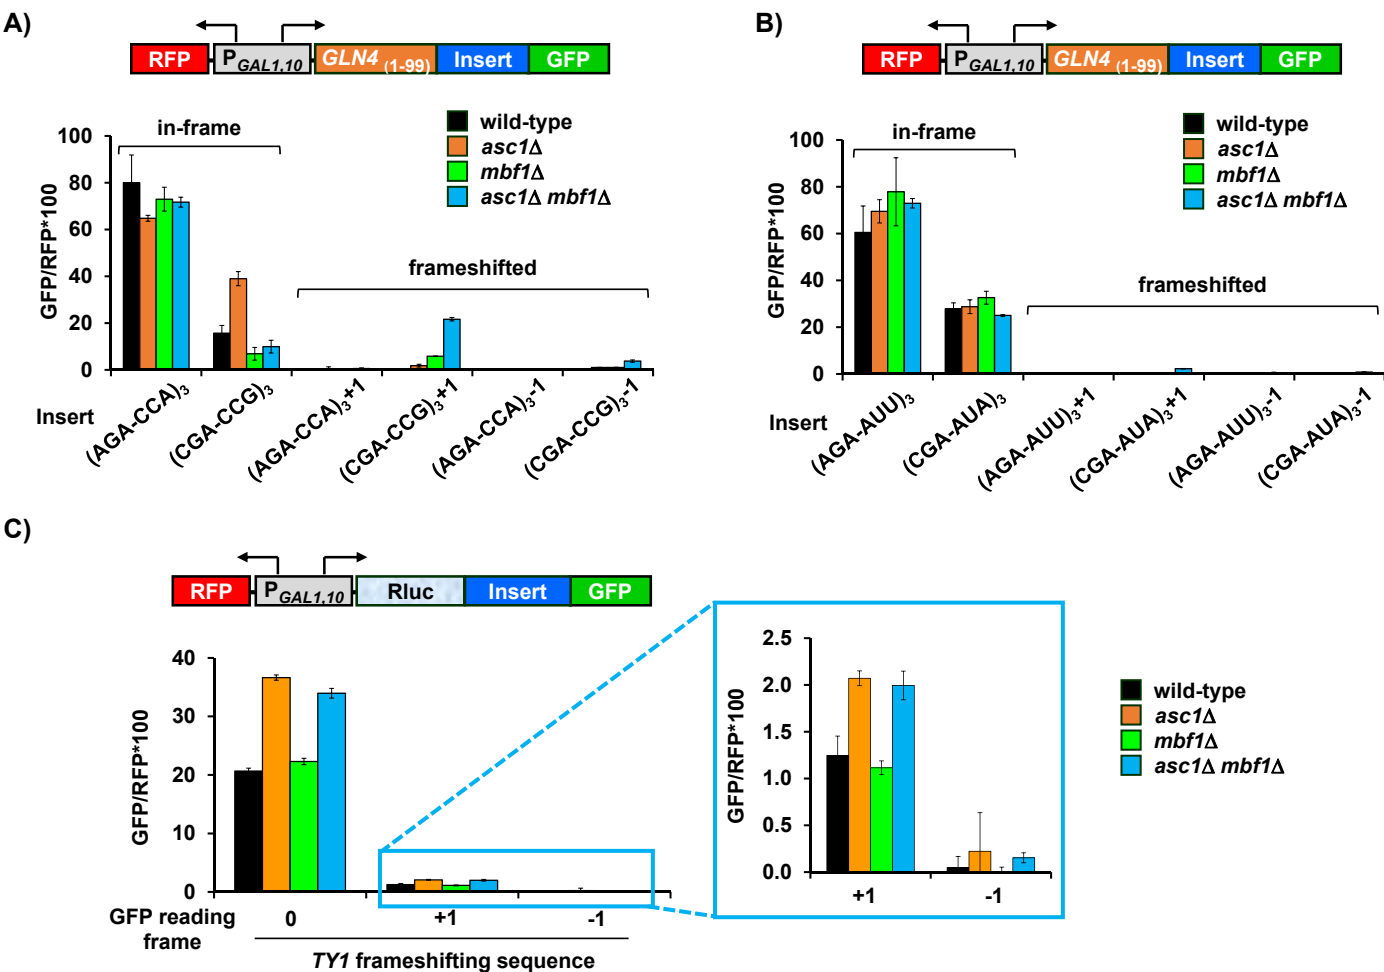

Supplement: supp [file elife_poa_e39637_Figure_4_figure_supplement_1.pdf › elife_poa_e39637_Figure_4_figure_supplement_1.pdf]

Figure 4-figure supplement 2

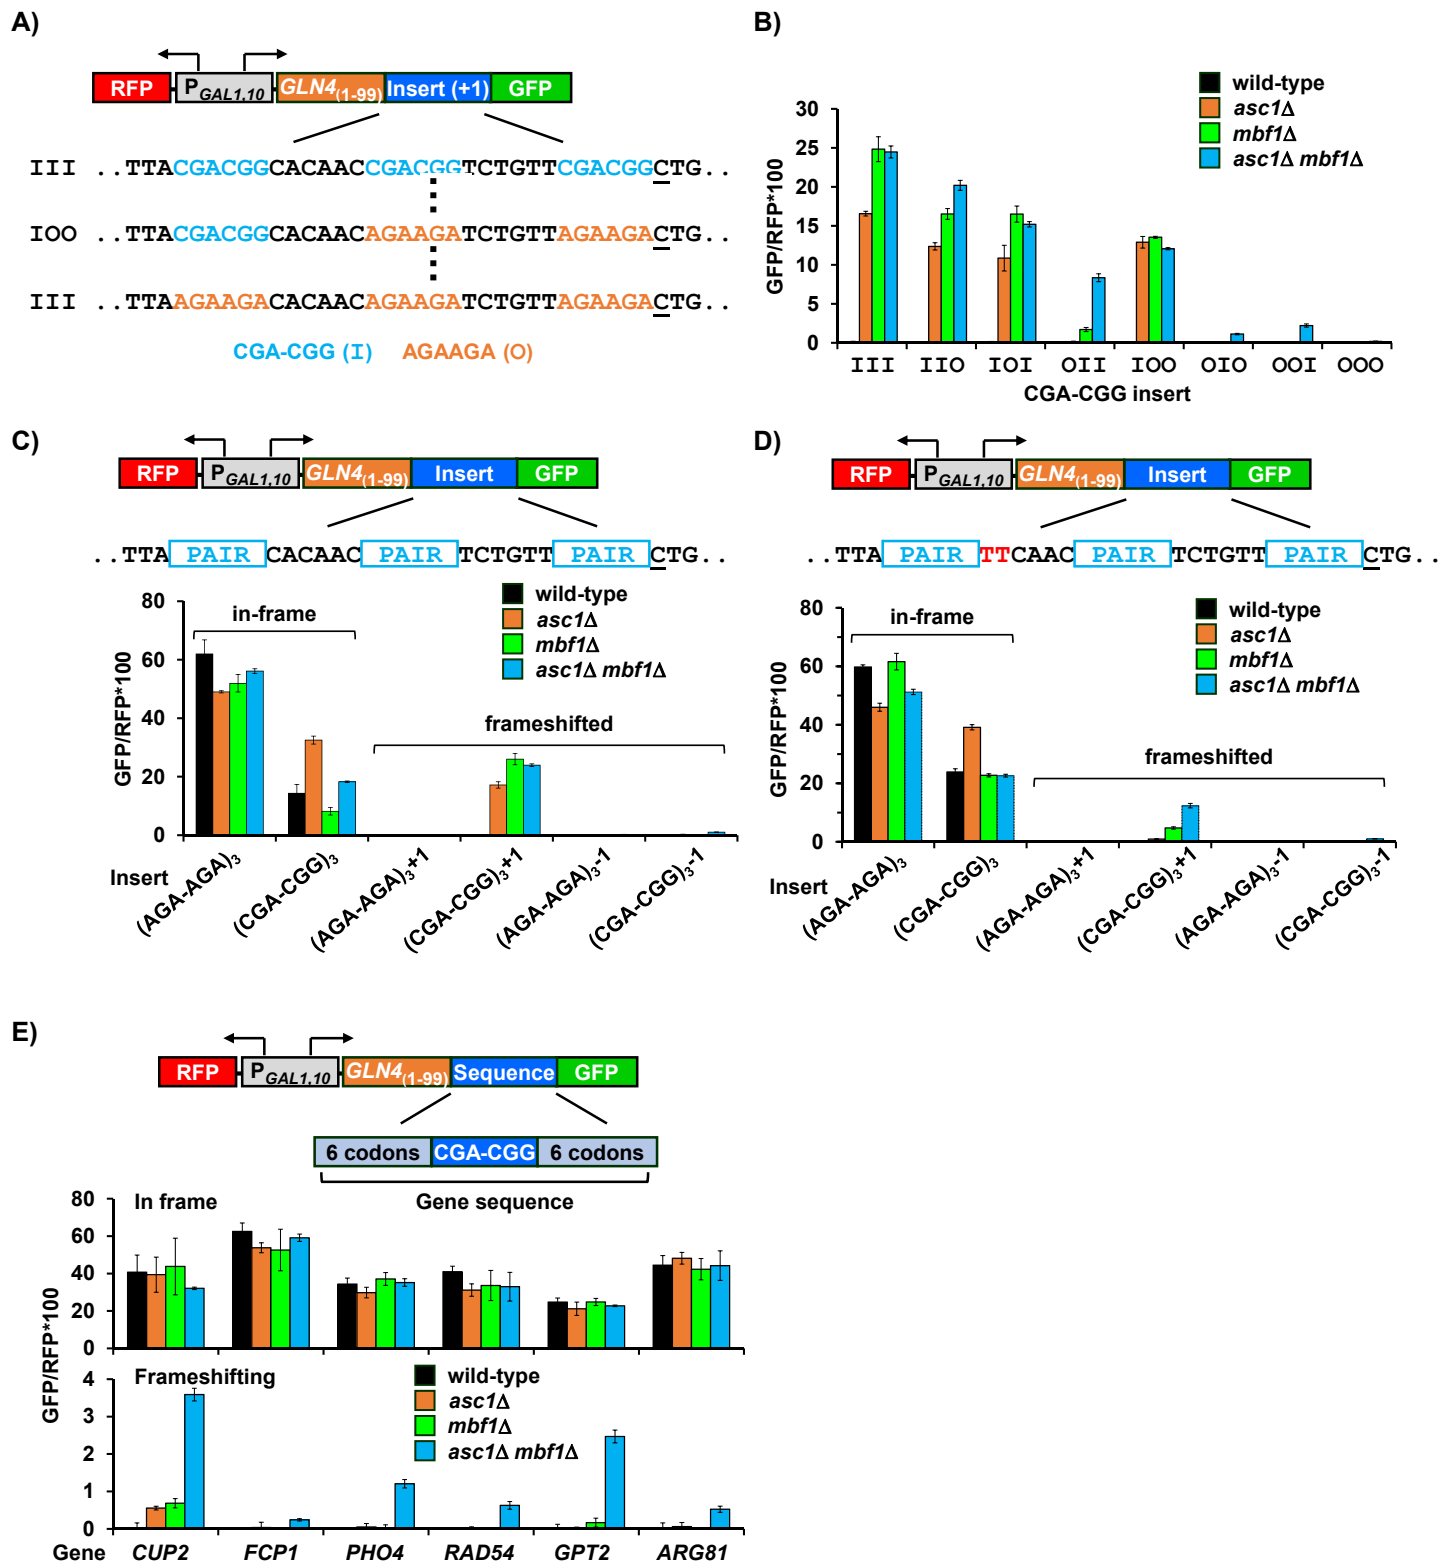

Supplement: supp [file elife_poa_e39637_Figure_4_figure_supplement_2.pdf › elife_poa_e39637_Figure_4_figure_supplement_2.pdf]
